# Supplementary material
Source: PubMed Central journal article supplement (PMC2230614)
Supplement: plntphys_pp.107.108852_1.pdf [file plntphys_pp.107.108852_1.pdf]

Li et al. *Ha* deletions during polyploid wheat speciation

TA2893 1 AGGTCGGATT CAGTACACGGAACATCACATATCTCAACAACCTCCACCAGTTTT-GTGTG  
Tim01 1 AGGTCGGATT CAGTACACGGAACATCACATATCTCAACAACCTCCACCAGTTTTGTGTG  
TA39 1 AGGTCGGATT CAGTACACGGAACATCACATATCTCAACAACCTCCACCAGTTTT-GTGTG  
TA2804 1 AGGTCGGATT CAGTACACGGAACATCACATATCTCAACAACCTCCACCAGTTTT-GTGTG  
TA808 1 AGGTCGGATT CAGTACACGGAACATCACATATCTCAACAACCTCCACCAGTTTT-GTGTG  
TA763 1 AGGTCGGATT CAGTACACGGAACATCACATATCTCAACAACCTCCACCAGTTTT-GTGTG  
TA2894 1 AGGTCGGATT CAGTACACGGAACATCACATATCTCAACAACCTCCACCAGTTTT-GTGTG  
TA2892 1 AGGTCGGATT CAGTACACGGAACATCACATATCTCAACAACCTCCACCAGTTTT-GTGTG

TA2893 60 CTTCCAAAGTAACTTTGATTGGTATCCAAC TAATCTTTAAGCATTAGCTGAAGCAACAC  
Tim01 61 CTTCCAAAGTAACTTTGATTGGTATCCAAC TAATCTTTAAGCATTAGCTGAAGCAACAC  
TA39 60 CTTCCAAAGTAACTTTGATTGGTATCCAAC TAATCTTTAAGCATTAGCTGAAGCAACAC  
TA2804 60 CTTCCAAAGTAACTTTGATTGGTATCCAAC TAATCTTTAAGCATTAGCTGAAGCAACAC  
TA808 60 CTTCCAAAGTAACTTTGATTGGTATCCAAC TAATCTTTAAGCATTAGCTGAAGCAACAC  
TA763 60 CTTCCAAAGTAACTTTGATTGGTATCCAAC TAATCTTTAAGCATTAGCTGAAGCAACAC  
TA2894 60 CTTCCAAAGTAACTTTGATTGGTATCCAAC TAATCTTTAAGCATTAGCTGAAGCAACAC  
TA2892 60 CTTCCAAAGTAACTTTGATTGGTATCCAAC TAATCTTTAAGCATTAGCTGAAGCAACAC

TA2893 120 ACAACTGCACACAGAAATCGTGCCACCTCATT TATAAATAAAGGTGTGGCCTCATCTCAT  
Tim01 121 ACAACTGCACACAGAAATCGTGCCACCTCATT TATAAATAAAGGTGTGGCCTCATCTCAT  
TA39 120 ACAACTGCACACAGAAATCGTGCCACCTCATT TATAAATAAAGGTGTGGCCTCATCTCAT  
TA2804 120 ACAACTGCACACAGAAATCGTGCCACCTCATT TATAAATAAAGGTGTGGCCTCATCTCAT  
TA808 120 ACAACTGCACACAGAAATCGTGCCACCTCATT TATAAATAAAGGTGTGGCCTCATCTCAT  
TA763 120 ACAACTGCACACAGAAATCGTGCCACCTCATT TATAAATAAAGGTGTGGCCTCATATCAT  
TA2894 120 ACAACTGCACACAGAAATCGTGCCACCTCATT TATAAATAAAGGTGTGGCCTCATCTCAT  
TA2892 120 ACAACTGCACACAGAAATCGTGCCACCTCATT TATAAATAAAGGTGTGGCCTCATCTCAT

\*

TA2893 180 CTATTCATCTCCACCTGCACGAAAACACACTGACAACATGAAGGCCCTCTTCCTCATAGG  
Tim01 181 CTATTCATCTCCACCTGCACGAAAACACACTGACAACATGAAGGCCCTCTTCCTCATAGG  
TA39 180 CTATTCATCTCCACCTGCACGAAAACACACTGACAACATGAAGGCCCTCTTCCTCATAGG  
TA2804 180 CTATTCATCTCCACCTGCACGAAAACACACTGACAACATGAAGGCCCTCTTCCTCATAGG  
TA808 180 CTATTCATCTCCACCTGCACGAAAACACACTGACAACATGAAGGCCCTCTTCCTCATAGG  
TA763 180 CTATTCATCTCCACCTGCACGAAAACACACTGACAACATGAAGGCCCTCTTCCTCATAGG  
TA2894 180 CTATTCATCTCCACCTGCACGAAAACACACTGACAACATGAAGGCCCTCTTCCTCATAGG  
TA2892 180 CTATTCATCTCCACCTGCACGAAAACACACTGACAACATGAAGGCCCTCTTCCTCATAGG

TA2893 240 CCTGCTTGCTCTGGTAGCGAGCACC GCCTTTGCGCAATATAGCGAAATTGTTGGCAGTTA  
Tim01 241 CCTGCTTGCTCTGGTAGCGAGCACC GCCTTTGCGCAATATAGCGAAATTGTTGGCAGTTA  
TA39 240 CCTGCTTGCTCTGGTAGCGAGCACC GCCTTTGCGCAATATAGCGAAATTGTTGGCAGTTA  
TA2804 240 CCTGCTTGCTCTGGTAGCGAGCACC GCCTTTGCGCAATATAGCGAAATTGTTGGCAGTTA  
TA808 240 CCTGCTTGCTCTGGTAGCGAGCACC GCCTTTGCGCAATATAGCGAAATTGTTGGCAGTTA  
TA763 240 CCTGCTTGCTCTGGTAGCGAGCACC GCCTTTGCGCAATATAGCGAAATTGTTGGCAGTTA  
TA2894 240 CCTGCTTGCTCTGGTAGCGAGCACC GCCTTTGCGCAATATAGCGAAATTGTTGGCAGTTA  
TA2892 240 CCTGCTTGCTCTGGTAGCGAGCACC GCCTTTGCGCAATATAGCGAAATTGTTGGCAGTTA

TA2893 300 CGATGTTGCTGGCGGGGGTGGTGCTCAACAATGCCCTCTAGAGACAAAGCTAAATTCATG  
Tim01 301 CGATGTTGCTGGCGGGGGTGGTGCTCAACAATGCCCTCTAGAGACAAAGCTAAATTCATG  
TA39 300 CGATGTTGCTGGCGGGGGTGGTGCTCAACAATGCCCTCTAGAGACAAAGCTAAATTCATG  
TA2804 300 CGATGTTGCTGGCGGGGGTGGTGCTCAACAATGCCCTCTAGAGACAAAGCTAAATTCATG  
TA808 300 CGATGTTGCTGGCGGGGGTGGTGCTCAACAATGCCCTCTAGAGACAAAGCTAAATTCATG  
TA763 300 CGATGTTGCTGGCGGGGGTGGTGCTCAACAATGCCCTCTAGAGACAAAGCTAAATTCATG  
TA2894 300 CGATGTTGCTGGCGGGGGTGGTGCTCAACAATGCCCTCTAGAGACAAAGCTAAATTCATG  
TA2892 300 CGATGTTGCTGGCGGGGGTGGTGCTCAACAATGCCCTCTAGAGACAAAGCTAAATTCATG

TA2893 360 CAGGAATTACCTGCTAGATCGATGCTCAACGATGAAGGATTTCCCGGTCACCTGGCGTTG  
Tim01 361 CAGGAATTACCTGCTAGATCGATGCTCAACGATGAAGGATTTCCCGGTCACCTGGCGTTG  
TA39 360 CAGGAATTACCTGCTAGATCGATGCTCAACGATGAAGGATTTCCCGGTCACCTGGCGTTG  
TA2804 360 CAGGAATTACCTGCTAGATCGATGCTCAACGATGAAGGATTTCCCGGTCACCTGGCGTTG  
TA808 360 CAGGAATTACCTGCTAGATCGATGCTCAACGATGAAGGATTTCCCGGTCACCTGGCGTTG  
TA763 360 CAGGAATTACCTGCTAGATCGATGCTCAACGATGAAGGATTTCCCGGTCACCTGGCGTTG  
TA2894 360 CAGGAATTACCTGCTAGATCGATGCTCAACGATGAAGGATTTCCCGGTCACCTGGCGTTG  
TA2892 360 CAGGAATTACCTGCTAGATCGATGCTCAACGATGAAGGATTTCCCGGTCACCTGGCGTTG

Li et al. *Ha* deletions during polyploid wheat speciation

TA2893 420 GTGGAAATGGTGAAGGGAGGTTGTCTAGAGCTCCTTGGGGAGTGTTCAGTCAGCTCGG  
Tim01 421 GTGGAAATGGTGAAGGGAGGTTGTCTAGAGCTCCTTGGGGAGTGTTCAGTCAGCTCGG  
TA39 420 GTGGAAATGGTGAAGGGAGGTTGTCTAGAGCTCCTTGGGGAGTGTTCAGTCAGCTCGG  
TA2804 420 GTGGAAATGGTGAAGGGAGGTTGTCTAGAGCTCCTTGGGGAGTGTTCAGTCAGCTCGG  
TA808 420 GTGGAAATGGTGAAGGGAGGTTGTCTAGAGCTCCTTGGGGAGTGTTCAGTCAGCTCGG  
TA763 420 GTGGAAATGGTGAAGGGAGGTTGTCTAGAGCTCCTTGGGGAGTGTTCAGTCAGCTCGG  
TA2894 420 GTGGAAATGGTGAAGGGAGGTTGTCTAGAGCTCCTTGGGGAGTGTTCAGTCAGCTCGG  
TA2892 420 GTGGAAATGGTGAAGGGAGGTTGTCTAGAGCTCCTTGGGGAGTGTTCAGTCAGCTCGG

TA2893 480 CCAAATGCCACCGCAATGCCGCTGCAACATCATCCAGGGGTCAATCCAAGGCGACCTCAG  
Tim01 481 CCAAATGCCACCGCAATGCCGCTGCAACATCATCCAGGGGTCAATCCAAGGCGACCTCAG  
TA39 480 CCAAATGCCACCGCAATGCCGCTGCAACATCATCCAGGGGTCAATCCAAGGCGACCTCAG  
TA2804 480 CCAAATGCCACCGCAATGCCGCTGCAACATCATCCAGGGGTCAATCCAAGGCGACCTCAG  
TA808 480 CCAAATGCCACCGCAATGCCGCTGCAACATCATCCAGGGGTCAATCCAAGGCGACCTCAG  
TA763 480 CCAAATGCCACCGCAATGCCGCTGCAACATCATCCAGGGGTCAATCCAAGGCGACCTCAG  
TA2894 480 CCAAATGCCACCGCAATGCCGCTGCAACATCATCCAGGGGTCAATCCAAGGCGACCTCAG  
TA2892 480 CCAAATGCCACCGCAATGCCGCTGCAACATCATCCAGGGGTCAATCCAAGGCGACCTCAG

TA2893 540 TGGCATCTTCGGATTTTCAGCGTGATCGGGCAAGCAAAGTGATACAAGAAGCCAAGAACCT  
Tim01 541 TGGCATCTTCGGATTTTCAGCGTGATCGGGCAAGCAAAGTGATACAAGAAGCCAAGAACCT  
TA39 540 TGGCATCTTCGGATTTTCAGCGTGATCGGGCAAGCAAAGTGATACAAGAAGCCAAGAACCT  
TA2804 540 TGGCATCTTCGGATTTTCAGCGTGATCGGGCAAGCAAAGTGATACAAGAAGCCAAGAACCT  
TA808 540 TGGCATCTTCGGATTTTCAGCGTGATCGGGCAAGCAAAGTGATACAAGAAGCCAAGAACCT  
TA763 540 TGGCATCTTCGGATTTTCAGCGTGATCGGGCAAGCAAAGTGATACAAGAAGCCAAGAACCT  
TA2894 540 TGGCATCTTCGGATTTTCAGCGTGATCGGGCAAGCAAAGTGATACAAGAAGCCAAGAACCT  
TA2892 540 TGGCATCTTCGGATTTTCAGCGTGATCGGGCAAGCAAAGTGATACAAGAAGCCAAGAACCT

TA2893 600 GCCGCCAGGTGCAACCAGGGCCCTCCCTGCAACATCCCCGGCACTAT-GGCTATTA  
Tim01 601 GCCGCCAGGTGCAACCAGGGCCCTCCCTGCAACATCCCCGGCACTATTGGCTATTA  
TA39 600 GCCGCCAGGTGCAACCAGGGCCCTCCCTGCAACATCCCCGGCACTATTGGCTATTA  
TA2804 600 GCCGCCAGGTGCAACCAGGGCCCTCCCTGCAACATCCCCGGCACTAT-GGCT-TTA  
TA808 600 GCCGCCAGGTGCAACCAGGGCCCTCCCTGCAACATCCCCGGCACTATTGGCTATTA  
TA763 600 GCCGCCAGGTGCAACCAGGGCCCTCCCTGCAACATCCCCGGCACTATTGGCTATTA  
TA2894 600 GCCGCCAGGTGCAACCAGGGCCCTCCCTGCAACATCCCCGGCACTATTGGCTATTA  
TA2892 600 GCCGCCAGGTGCAACCAGGGCCCTCCCTGCAACATCCCCGGCACTAT-GGCTATTA

Supplementary Fig. 1s. Alignment of *Pina* sequences from *T. timopheevii* and *T. urartu*. \* indicates position of the start codon. Accessions TA39, TA2804, TA2892, TA2893, TA2894 and Tim01 are *T. timopheevii*. TA763 and TA808 are *T. urartu* and their sequences were retrieved from GenBank under accession numbers AJ302094 and AJ302095, respectively.

Li et al. *Ha* deletions during polyploid wheat speciation

|        |     |                                                               |
|--------|-----|---------------------------------------------------------------|
| TA2893 | 1   | CGTCACCTGTCTCAACAACGCACCATTCTGTGGCTCGCAAAGTAACTTTAATTTGTGA    |
| TA2894 | 1   | CGTCACCTGTCTCAACAACGCACCATTCTGTGGCTCGCAAAGTAACTTTAATTTGTGA    |
| Tim01  | 1   | CGTCACCTGTCTCAACAACGCACCATTCTGTGGCTCGCAAAGTAACTTTAATTTGTGA    |
| TA2804 | 1   | CGTCACCTGTCTCAACAACGCACCATTCTGTGGCTCGCAAAGTAACTTTAATTTGTGA    |
| TA2892 | 1   | CGTCACCTGTCTCAACAACGCACCATTCTGTGGCTCGCAAAGTAACTTTAATTTGTGA    |
| TA39   | 1   | CGTCACCTGTCTCAACAACGCACCATTCTGTGGCTCGCAAAGTAACTTTAATTTGTGA    |
| TA763  | 1   | CGTCACCTGTCTCAACAACGCACCATTCTGTGGCTCGCAAAGTAACTTTAATTTGTGA    |
| TA808  | 1   | CGTCACCTGTCTCAACAACGCACCATTCTGTGGCTCGCAAAGTAACTTTAATTTGTGA    |
|        |     |                                                               |
| TA2893 | 1   | GCATTAGCCAAAGCAACACACAATGGTAGGCCAAAACCATGTCACCTAAGCAATAAATAAA |
| TA2894 | 61  | GCATTAGCCAAAGCAACACACAATGGTAGGCCAAAACCATGTCACCTAAGCAATAAATAAA |
| Tim01  | 61  | GCATTAGCCAAAGCAACACACAATGGTAGGCCAAAACCATGTCACCTAAGCAATAAATAAA |
| TA2804 | 61  | GCATTAGCCAAAGCAACACACAATGGTAGGCCAAAACCATGTCACCTAAGCAATAAATAAA |
| TA2892 | 61  | GCATTAGCCAAAGCAACACACAATGGTAGGCCAAAACCATGTCACCTAAGCAATAAATAAA |
| TA39   | 61  | GCATTAGCCAAAGCAACACACAATGGTAGGCCAAAACCATGTCACCTAAGCAATAAATAAA |
| TA763  | 61  | GCATTAGCCAAAGCAACACACAATGGTAGGCCAAAACCATGTCACCTAAGCAATAAATAAA |
| TA808  | 61  | GCATTAGCCAAAGCAACACACAATGGTAGGCCAAAACCATGTCACCTAAGCAATAAATAAA |
|        |     |                                                               |
| *      |     |                                                               |
| TA2893 | 121 | GGGGAGCCTCAACCCATCTATTTCATCTCCACCACCACCACCAAACAACATTGAAAAACAT |
| TA2894 | 121 | GGGGAGCCTCAACCCATCTATTTCATCTCCACCACCACCACCAAACAACATTGAAAAACAT |
| Tim01  | 121 | GGGGAGCCTCAACCCATCTATTTCATCTCCACCACCACCACCAAACAACATTGAAAAACAT |
| TA2804 | 121 | GGGGAGCCTCAACCCATCTATTTCATCTCCACCACCACCACCAAACAACATTGAAAAACAT |
| TA2892 | 121 | GGGGAGCCTCAACCCATCTATTTCATCTCCACCACCACCACCAAACAACATTGAAAAACAT |
| TA39   | 121 | GGGGAGCCTCAACCCATCTATTTCATCTCCACCACCACCACCAAACAACATTGAAAAACAT |
| TA763  | 121 | GGGGAGCCTCAACCCATCTATTTCATCTCCACCACCACCACCAAACAACATTGAAAAACAT |
| TA808  | 121 | GGGGAGCCTCAACCCATCTATTTCATCTCCACCACCACCACCAAACAACATTGAAAAACAT |
|        |     |                                                               |
| TA2893 | 181 | GAAGACCTTATTCCCTCCTAGCCCTCCTTGCTCTTGTAGCGAGCACAACCTTCGCGCAATA |
| TA2894 | 181 | GAAGACCTTATTCCCTCCTAGCCCTCCTTGCTCTTGTAGCGAGCACAACCTTCGCGCAATA |
| Tim01  | 181 | GAAGACCTTATTCCCTCCTAGCCCTCCTTGCTCTTGTAGCGAGCACAACCTTCGCGCAATA |
| TA2804 | 181 | GAAGACCTTATTCCCTCCTAGCCCTCCTTGCTCTTGTAGCGAGCACAACCTTCGCGCAATA |
| TA2892 | 181 | GAAGACCTTATTCCCTCCTAGCCCTCCTTGCTCTTGTAGCGAGCACAACCTTCGCGCAATA |
| TA39   | 181 | GAAGACCTTATTCCCTCCTAGCCCTCCTTGCTCTTGTAGCGAGCACAACCTTCGCGCAATA |
| TA763  | 181 | GAAGACCTTATTCCCTCCTAGCCCTCCTTGCTCTTGTAGCGAGCACAACCTTCGCGCAATA |
| TA808  | 181 | GAAGACCTTATTCCCTCCTAGCCCTCCTTGCTCTTGTAGCGAGCACAACCTTCGCGCAATA |
|        |     |                                                               |
| TA2893 | 241 | CTCAGAAGTTGGTGGCTGGTACAATGAAGTTGGTGCAGGAGGTGGTTCTCAACAATGCC   |
| TA2894 | 241 | CTCAGAAGTTGGTGGCTGGTACAATGAAGTTGGTGCAGGAGGTGGTTCTCAACAATGCC   |
| Tim01  | 241 | CTCAGAAGTTGGTGGCTGGTACAATGAAGTTGGTGCAGGAGGTGGTTCTCAACAATGCC   |
| TA2804 | 241 | CTCAGAAGTTGGTGGCTGGTACAATGAAGTTGGTGCAGGAGGTGGTTCTCAACAATGCC   |
| TA2892 | 241 | CTCAGAAGTTGGTGGCTGGTACAATGAAGTTGGTGCAGGAGGTGGTTCTCAACAATGCC   |
| TA39   | 241 | CTCAGAAGTTGGTGGCTGGTACAATGAAGTTGGTGCAGGAGGTGGTTCTCAACAATGCC   |
| TA763  | 241 | CTCAGAAGTTGGTGGCTGGTACAATGAAGTTGGTGCAGGAGGTGGTTCTCAACAATGCC   |
| TA808  | 241 | CTCAGAAGTTGGTGGCTGGTACAATGAAGTTGGTGCAGGAGGTGGTTCTCAACAATGCC   |
|        |     |                                                               |
| TA2893 | 301 | GCTGGAGCGGCCGAAGCTAAGCTCTTGCAAGGATTACGTGATGGAGCGGTGTTTCACAAT  |
| TA2894 | 301 | GCTGGAGCGGCCGAAGCTAAGCTCTTGCAAGGATTACGTGATGGAGCGGTGTTTCACAAT  |
| Tim01  | 301 | GCTGGAGCGGCCGAAGCTAAGCTCTTGCAAGGATTACGTGATGGAGCGGTGTTTCACAAT  |
| TA2804 | 301 | GCTGGAGCGGCCGAAGCTAAGCTCTTGCAAGGATTACGTGATGGAGCGGTGTTTCACAAT  |
| TA2892 | 301 | GCTGGAGCGGCCGAAGCTAAGCTCTTGCAAGGATTACGTGATGGAGCGGTGTTTCACAAT  |
| TA39   | 301 | GCTGGAGCGGCCGAAGCTAAGCTCTTGCAAGGATTACGTGATGGAGCGGTGTTTCACAAT  |
| TA763  | 301 | GCTGGAGCGGCCGAAGCTAAGCTCTTGCAAGGATTACGTGATGGAGCGGTGTTTCACAAT  |
| TA808  | 301 | GCTGGAGCGGCCGAAGCTAAGCTCTTGCAAGGATTACGTGATGGAGCGGTGTTTCACAAT  |
|        |     |                                                               |
| TA2893 | 361 | GAAGGATTTTCCAGTCACTTGGCCACGAAATGGTGAAGGGAGGTTGTGAGCACGAGGT    |
| TA2894 | 361 | GAAGGATTTTCCAGTCACTTGGCCACGAAATGGTGAAGGGAGGTTGTGAGCACGAGGT    |
| Tim01  | 361 | GAAGGATTTTCCAGTCACTTGGCCACGAAATGGTGAAGGGAGGTTGTGAGCACGAGGT    |
| TA2804 | 361 | GAAGGATTTTCCAGTCACTTGGCCACGAAATGGTGAAGGGAGGTTGTGAGCACGAGGT    |
| TA2892 | 361 | GAAGGATTTTCCAGTCACTTGGCCACGAAATGGTGAAGGGAGGTTGTGAGCACGAGGT    |
| TA39   | 361 | GAAGGATTTTCCAGTCACTTGGCCACGAAATGGTGAAGGGAGGTTGTGAGCACGAGGT    |
| TA763  | 361 | GAAGGATTTTCCAGTCACTTGGCCACGAAATGGTGAAGGGAGGTTGTGAGCACGAGGT    |
| TA808  | 361 | GAAGGATTTTCCAGTCACTTGGCCACGAAATGGTGAAGGGAGGTTGTGAGCACGAGGT    |

Li et al. *Ha* deletions during polyploid wheat speciation

TA2893 421 TCGGGAGAAGTGCTGCCAGCAGCTGAGCCAGATAGCACCACAGTGTGCTGCGATTCTAT  
 TA2894 421 TCGGGAGAAGTGCTGCCAGCAGCTGAGCCAGATAGCACCACAGTGTGCTGCGATTCTAT  
 Tim01 421 TCGGGAGAAGTGCTGCCAGCAGCTGAGCCAGATAGCACCACAGTGTGCTGCGATTCTAT  
 TA2804 421 TCGGGAGAAGTGCTGCCAGCAGCTGAGCCAGATAGCACCACAGTGTGCTGCGATTCTAT  
 TA2892 421 TCGGGAGAAGTGCTGCCAGCAGCTGAGCCAGATAGCACCACAGTGTGCTGCGATTCTAT  
 TA39 421 TCGGGAGAAGTGCTGCCAGCAGCTGAGCCAGATAGCACCACAGTGTGCTGCGATTCTAT  
 TA763 421 TCGGGAGAAGTGCTGCCAGCAGCTGAGCCAGATAGCACCACAGTGTGCTGCGATTCTAT  
 TA808 421 TCGGGAGAAGTGCTGCCAGCAGCTGAGCCAGATAGCACCACAGTGTCTGCGATTCTAT

TA2893 481 CCGAGGAATGATCCAAGGCAAGCTCGGTGGCTTCTTCGGAATTTGGCGAGGTGATGTATT  
 TA2894 481 CCGAGGAATGATCCAAGGCAAGCTCGGTGGCTTCTTCGGAATTTGGCGAGGTGATGTATT  
 Tim01 481 CCGAGGAATGATCCAAGGCAAGCTCGGTGGCTTCTTCGGAATTTGGCGAGGTGATGTATT  
 TA2804 481 CCGAGGAATGATCCAAGGCAAGCTCGGTGGCTTCTTCGGAATTTGGCGAGGTGATGTATT  
 TA2892 481 CCGAGGAATGATCCAAGGCAAGCTCGGTGGCTTCTTCGGAATTTGGCGAGGTGATGTATT  
 TA39 481 CCGAGGAATGATCCAAGGCAAGCTCGGTGGCTTCTTCGGAATTTGGCGAGGTGATGTATT  
 TA763 481 CCGAGGAATGATCCAAGGCAAGCTCGGTGGCTTCTTCGGAATTTGGCGAGGTGATGTATT  
 TA808 481 CCGAGGAATGATCCAAGGCAAGCTCGGTGGCTTCTTCGGAATTTGGCGAGGTGATGTATT

TA2893 541 CAAACAAATTCAGAGGGCCAGAGCCTCCCCTCAAAGTGCAACATGGGAGCCGACTGCAA  
 TA2894 541 CAAACAAATTCAGAGGGCCAGAGCCTCCCCTCAAAGTGCAACATGGGAGCCGACTGCAA  
 Tim01 541 CAAACAAATTCAGAGGGCCAGAGCCTCCCCTCAAAGTGCAACATGGGAGCCGACTGCAA  
 TA2804 541 CAAACAAATTCAGAGGGCCAGAGCCTCCCCTCAAAGTGCAACATGGGAGCCGACTGCAA  
 TA2892 541 CAAACAAATTCAGAGGGCCAGAGCCTCCCCTCAAAGTGCAACATGGGAGCCGACTGCAA  
 TA39 541 CAAACAAATTCAGAGGGCCAGAGCCTCCCCTCAAAGTGCAACATGGGAGCCGACTGCAA  
 TA763 541 CAAACAAATTCAGAGGGCCAGAGCCTCCCCTCAAAGTGCAACATGGGAGCCGACTGCAA  
 TA808 541 CAAACAAATTCAGAGGGCCAGAGCCTCCCCTCAAAGTGCAACATGGGAGCCGACTGCAA

TA2893 601 ATTACCTAGTGGCTATTACTGGTGTATGATATAGCCTCTATFCGTGACCAATAAAAATGTCA  
 TA2894 601 ATTACCTAGTGGCTATTACTGGTGTATGATATAGCCTCTATFCGTGACCAATAAAAATGTCA  
 Tim01 601 ATTACCTAGTGGCTATTACTGGTGTATGATATAGCCTCTATFCGTGACCAATAAAAATGTCA  
 TA2804 601 ATTACCTAGTGGCTATTACTGGTGTATGATATAGCCTCTATFCGTGACCAATAAAAATGTCA  
 TA2892 601 ATTACCTAGTGGCTATTACTGGTGTATGATATAGCCTCTATFCGTGACCAATAAAAATGTCA  
 TA39 601 ATTACCTAGTGGCTATTACTGGTGTATGATATAGCCTCTATFCGTGACCAATAAAAATGTCA  
 TA763 601 ATTACCTAGTGGCTATTACTGGTGTATGATATAGCCTCTATFCGTGACCAATAAAAATGTCA  
 TA808 601 ATTACCTAGTGGCTATTACTGGTGTATGATATAGCCTCTATFCGTGACCAATAAAAATGTCA

TA2893 661 CATACCACAACATGGGAGCCGACTGCAAATTACCTAGTGGCTATTACTGGTGTATGATATA  
 TA2894 661 CATACCACAACATGGGAGCCGACTGCAAATTACCTAGTGGCTATTACTGGTGTATGATATA  
 Tim01 661 CATACCACAACATGGGAGCCGACTGCAAATTACCTAGTGGCTATTACTGGTGTATGATATA  
 TA2804 661 CATACCACAACATGGGAGCCGACTGCAAATTACCTAGTGGCTATTACTGGTGTATGATATA  
 TA2892 661 CATACCACAACATGGGAGCCGACTGCAAATTACCTAGTGGCTATTACTGGTGTATGATATA  
 TA39 661 CATACCACAACATGGGAGCCGACTGCAAATTACCTAGTGGCTATTACTGGTGTATGATATA  
 TA763 661 CATACCA-----  
 TA808 661 CATACCA-----

TA2893 721 GCCTCTATTTCGTGACCAATAAAAATGTCACATACCACAACATGGGAGCCGACTGCAAATTA  
 TA2894 721 GCCTCTATTTCGTGACCAATAAAAATGTCACATACCACAACATGGGAGCCGACTGCAAATTA  
 Tim01 721 GCCTCTATTTCGTGACCAATAAAAATGTCACATACCACAACATGGGAGCCGACTGCAAATTA  
 TA2804 721 GCCTCTATTTCGTGACCAATAAAAATGTCACATACCACAACATGGGAGCCGACTGCAAATTA  
 TA2892 721 GCCTCTATTTCGTGACCAATAAAAATGTCACATACCACAACATGGGAGCCGACTGCAAATTA  
 TA39 721 GCCTCTATTTCGTGACCAATAAAAATGTCACATACCACAACATGGGAGCCGACTGCAAATTA  
 TA763 -----  
 TA808 -----

TA2893 781 CCTAGTGGCTATTACTGGTGTATGATATAGCCTCTATTCGTGACCAATAAAAATGTCACATA  
 TA2894 781 CCTAGTGGCTATTACTGGTGTATGATATAGCCTCTATTCGTGACCAATAAAAATGTCACATA  
 Tim01 781 CCTAGTGGCTATTACTGGTGTATGATATAGCCTCTATTCGTGACCAATAAAAATGTCACATA  
 TA2804 781 CCTAGTGGCTATTACTGGTGTATGATATAGCCTCTATTCGTGACCAATAAAAATGTCACATA  
 TA2892 781 CCTAGTGGCTATTACTGGTGTATGATATAGCCTCTATTCGTGACCAATAAAAATGTCACATA  
 TA39 781 CCTAGTGGCTATTACTGGTGTATGATATAGCCTCTATTCGTGACCAATAAAAATGTCACATA  
 TA763 -----  
 TA808 -----

TA2893 841 CCACAACATGTGACAAATAAGTGTGCTCGTATGATAATCTATGAATAAAAATCACCCCTTGT  
 TA2894 841 CCACAACATGTGACAAATAAGTGTGCTCGTATGATAATCTATGAATAAAAATCACCCCTTGT  
 Tim01 841 CCACAACATGTGACAAATAAGTGTGCTCGTATGATAATCTATGAATAAAAATCACCCCTTGT  
 TA2804 841 CCACAACATGTGACAAATAAGTGTGCTCGTATGATAATCTATGAATAAAAATCACCCCTTGT  
 TA2892 841 CCACAACATGTGACAAATAAGTGTGCTCGTATGATAATCTATGAATAAAAATCACCCCTTGT  
 TA39 841 CCACAACATGTGACAAATAAGTGTGCTCGTATGATAATCTATGAATAAAAATCACCCCTTGT  
 TA763 668 ---CAACATGTGACAAATAAGTGTGCTCGTATGATAATCTATGAATAAAAATCACCCCTTGT  
 TA808 668 ---CAACATGTGACAAATAAGTGTGCTCGTATGATAATCTATGAATAAAAATCACCCCTTGT

## Li et al. *Ha* deletions during polyploid wheat speciation

```
TA2893  901  ATATTGATTTGTGTTGGAGA
TA2894  901  ATATTGATTTGTGTTGGAGA
Tim01   901  ATATTGATTTGTGTTGGAGA
TA2804  901  ATATTGATTTGTGTTGGAGA
TA2892  901  ATATTGATTTGTGTTGGAGA
TA39    901  ATATTGATTTGTGTTGGAGA
TA763   725  ATATTGATTTGTGTTGGAGA
TA808   725  ATATTGATTTGTGTTGGAGA
```

Supplementary Fig. 2s. Alignment of *Pinb* sequences from *T. timopheevii* and *T. urartu*. Accessions TA39, TA2804, TA2892, TA2893, TA2894 and Tim01 are *T. timopheevii*. TA763 and TA808 are *T. urartu* and their sequences were retrieved from GenBank under accession numbers AJ302103 and AJ302104, respectively. \* indicates the start codon. The 88-bp tandem repeats are highlighted in yellow, green and blue. The 7-mer CAACATG flanking the triplication is underlined.

## Li et al. *Ha* deletions during polyploid wheat speciation

```
TA39      1  MKALFLIGLLALVASTAFAQYSEIVGSYDVAGGGGAQQCPLETKLNSCRNYLLDRCSTMK
Tim01    1  MKALFLIGLLALVASTAFAQYSEIVGSYDVAGGGGAQQCPLETKLNSCRNYLLDRCSTMK
TA763    1  MKALFLIGLLALVASTAFAQYSEIVGSYDVAGGGGAQQCPLETKLNSCRNYLLDRCSTMK
TA808    1  MKALFLIGLLALVASTAFAQYSEIVGSYDVAGGGGAQQCPLETKLNSCRNYLLDRCSTMK
TA2894   1  MKALFLIGLLALVASTAFAQYSEIVGSYDVAGGGGAQQCPLETKLNSCRNYLLDRCSTMK
TA2892   1  MKALFLIGLLALVASTAFAQYSEIVGSYDVAGGGGAQQCPLETKLNSCRNYLLDRCSTMK
TA2893   1  MKALFLIGLLALVASTAFAQYSEIVGSYDVAGGGGAQQCPLETKLNSCRNYLLDRCSTMK
TA2804   1  MKALFLIGLLALVASTAFAQYSEIVGSYDVAGGGGAQQCPLETKLNSCRNYLLDRCSTMK

TA39     61  DFPVTRWWWKWKGGCLELLGECSSQLGQMPPQCRNIIQGSIQGDLSGIFGFQRDRASK
Tim01    61  DFPVTRWWWKWKGGCLELLGECSSQLGQMPPQCRNIIQGSIQGDLSGIFGFQRDRASK
TA763    61  DFPVTRWWWKWKGGCLELLGECSSQLGQMPPQCRNIIQGSIQGDLSGIFGFQRDRASK
TA808    61  DFPVTRWWWKWKGGCLELLGECSSQLGQMPPQCRNIIQGSIQGDLSGIFGFQRDRASK
TA2894   61  DFPVTRWWWKWKGGCLELLGECSSQLGQMPPQCRNIIQGSIQGDLSGIFGFQRDRASK
TA2892   61  DFPVTRWWWKWKGGCLELLGECSSQLGQMPPQCRNIIQGSIQGDLSGIFGFQRDRASK
TA2893   61  DFPVTRWWWKWKGGCLELLGECSSQLGQMPPQCRNIIQGSIQGDLSGIFGFQRDRASK
TA2804   61  DFPVTRWWWKWKGGCLELLGECSSQLGQMPPQCRNIIQGSIQGDLSGIFGFQRDRASK

TA39     121 VIQEAKNLPPRCNQGPCNIPGTIGY
Tim01    121 VIQEAKNLPPRCNQGPCNIPGTIGY
TA763    121 VIQEAKNLPPRCNQGPCNIPGTIGY
TA808    121 VIQEAKNLPPRCNQGPCNIPGTIGY
TA2894   121 VIQEAKNLPPRCNQGPCNIPGTIGY
TA2892   121 VIQEAKNLPPRCNQGPCNIPGTMAI
TA2893   121 VIQEAKNLPPRCNQGPCNIPGTMAI
TA2804   121 VIQEAKNLPPRCNQGPCNIPGTMAI
```

Supplementary Fig. 3s. Alignment of PINA protein sequences of *T. timopheevii* and *T. urartu*. Accessions TA39, TA2804, TA2892, TA2893, TA2894 and Tim01 are *T. timopheevii*. TA763 and TA808 are *T. urartu* and their sequences were retrieved from GenBank under accession numbers CAC33797 and CAC33798.

Li et al. *Ha* deletions during polyploid wheat speciation

Tim01 1 MKTLFLLALLALVASTTFAQYSEVGGWYNEVGAGGGSQQCPLERPKLSSCKDYVMERCFT  
 TA2804 1 MKTLFLLALLALVASTTFAQYSEVGGWYNEVGAGGGSQQCPLERPKLSSCKDYVMERCFT  
 TA39 1 MKTLFLLALLALVASTTFAQYSEVGGWYNEVGAGGGSQQCPLERPKLSSCKDYVMERCFT  
 TA2892 1 MKTLFLLALLALVASTTFAQYSEVGGWYNEVGAGGGSQQCPLERPKLSSCKDYVMERCFT  
 TA2893 1 MKTLFLLALLALVASTTFAQYSEVGGWYNEVGAGGGSQQCPLERPKLSSCKDYVMERCFT  
 TA2894 1 MKTLFLLALLALVASTTFAQYSEVGGWYNEVGAGGGSQQCPLERPKLSSCKDYVMERCFT  
 TA808 1 MKTLFLLALLALVASTTFAQYSEVGGWYNEVGAGGGSQQCPLERPKLSSCKDYVMERCFT  
 TA763 1 MKTLFLLALLALVASTTFAQYSEVGGWYNEVGAGGGSQQCPLERPKLSSCKDYVMERCFT

Tim01 61 LKDFPVTWPTKWWKGGCEHEVREKCCQQLSQIAPQCRCD SIRGMIQGKLGFFFGIWRGDV  
 TA2804 61 LKDFPVTWPTKWWKGGCEHEVREKCCQQLSQIAPQCRCD SIRGMIQGKLGFFFGIWRGDV  
 TA39 61 MKDFPVTWPTKWWKGGCEHEVREKCCQQLSQIAPQCRCD SIRGMIQGKLGFFFGIWRGDV  
 TA2892 61 MKDFPVTWPTKWWKGGCEHEVREKCCQQLSQIAPQCRCD SIRGMIQGKLGFFFGIWRGDV  
 TA2893 61 MKDFPVTWPTKWWKGGCEHEVREKCCQQLSQIAPQCRCD SIRGMIQGKLGFFFGIWRGDV  
 TA2894 61 MKDFPVTWPTKWWKGGCEHEVREKCCQQLSQIAPQCRCD SIRGMIQGKLGFFFGIWRGDV  
 TA808 61 MKDFPVTWPTKWWKGGCEHEVREKCCQQLSQIAPQCRCD SIRGMIQGKLGFFFGIWRGDV  
 TA763 61 MKDFPVTWPTKWWKGGCEHEVREKCCQQLSQIAPQCLCDSIRGMIQGKLGFFFGIWRGDV

Tim01 121 FKQIQRAQSLPSKCNMGADCKLPSGYYW  
 TA2804 121 FKQIQRAQSLPSKCNMGADCKLPSGYYW  
 TA39 121 FKQIQRAQSLPSKCNMGADCKLPSGYYW  
 TA2892 121 FKQIQRAQSLPSKCNMGADCKLPSGYYW  
 TA2893 121 FKQIQRAQSLPSKCNMGADCKLPSGYYW  
 TA2894 121 FKQIQRAQSLPSKCNMGADCKLPSGYYW  
 TA808 121 FKQIQRAQSLPSKCNMGADCKLPSGYYW  
 TA763 121 FKQIQRAQSLPSKCNMGADCKLPSGYYW

Supplementary Fig. 4s. Alignment of PINB protein sequences of *T. timopheevii* and *T. urartu*. Accessions TA39, TA2804, TA2892, TA2893, TA2894 and Tim01 are *T. timopheevii*. TA763 and TA808 and *T. urartu* and their sequences were retrieved from GenBank under accession numbers CAC33799 and CAC33800.

Li et al. *Ha* deletions during polyploid wheat speciation

|           |     |                                                               |
|-----------|-----|---------------------------------------------------------------|
| PI355352  | 1   | ATGAAGGCCCTCTTCCTCATAGGCCTGCTTGCTCTGGTAGCGAGCACCGCCTTTGCGCAA  |
| PI355353  | 1   | ATGAAGGCCCTCTTCCTCATAGGCCTGCTTGCTCTGGTAGCGAGCACCGCCTTTGCGCAA  |
| TA2610    | 1   | ATGAAGGCCCTCTTCCTCATAGGCCTGCTTGCTCTGGTAGCGAGCACCGCCTTTGCGCAA  |
| AJ249933m | 1   | ATGAAGGCCCTCTTCCTCATAGGCCTGCTTGCTCTGGTAGCGAGCACCGCCTTTGCGCAA  |
| AJ242715m | 1   | ATGAAGGCCCTCTTCCTCATAGGCCTGCTTGCTCTGGTAGCGAGCACCGCCTTTGCGCAA  |
| AJ302093m | 1   | ATGAAGGCCCTCTTCCTCATAGGCCTGCTTGCTCTGGTAGCGAGCACCGCCTTTGCGCAA  |
| Timopheev | 1   | ATGAAGGCCCTCTTCCTCATAGGCCTGCTTGCTCTGGTAGCGAGCACCGCCTTTGCGCAA  |
| DQ269826u | 1   | ATGAAGGCCCTCTTCCTCATAGGCCTGCTTGCTCTGGTAGCGAGCACCGCCTTTGCGCAA  |
| DQ269827u | 1   | ATGAAGGCCCTCTTCCTCATAGGCCTGCTTGCTCTGGTAGCGAGCACCGCCTTTGCGCAA  |
| DQ269828u | 1   | ATGAAGGCCCTCTTCCTCATAGGCCTGCTTGCTCTGGTAGCGAGCACCGCCTTTGCGCAA  |
| DQ269823m | 1   | ATGAAGGCCCTCTTCCTCATAGGCCTGCTTGCTCTGGTAGCGAGCACCGCCTTTGCGCAA  |
| DQ269822a | 1   | ATGAAGGCCCTCTTCCTCATAGGCCTGCTTGCTCTGGTAGCGAGCACCGCCTTTGCGCAA  |
| DQ269821a | 1   | ATGAAGGCCCTCTTCCTCATAGGCCTGCTTGCTCTGGTAGCGAGCACCGCCTTTGCGCAA  |
| DQ269820a | 1   | ATGAAGGCCCTCTTCCTCATAGGCCTGCTTGCTCTGGTAGCGAGCACCGCCTTTGCGCAA  |
| DQ269819a | 1   | ATGAAGGCCCTCTTCCTCATAGGCCTGCTTGCTCTGGTAGCGAGCACCGCCTTTGCGCAA  |
| AJ302092m | 1   | ATGAAGGCCCTCTTCCTCATAGGCCTGCTTGCTCTGGTAGCGAGCACCGCCTTTGCGCAA  |
|           |     |                                                               |
| PI355352  | 61  | TATAGCGAAATTGTTGGCAGTTACGATGTTGCTGGCGGGGGTGGTGCCTCAACAATGCCCT |
| PI355353  | 61  | TATAGCGAAATTGTTGGCAGTTACGATGTTGCTGGCGGGGGTGGTGCCTCAACAATGCCCT |
| TA2610    | 61  | TATAGCGAAATTGTTGGCAGTTACGATGTTGCTGGCGGGGGTGGTGCCTCAACAATGCCCT |
| AJ249933m | 61  | TATAGCGAAATTGTTGGCAGTTACGATGTTGCTGGCGGGGGTGGTGCCTCAACAATGCCCT |
| AJ242715m | 61  | TATAGCGAAATTGTTGGCAGTTACGATGTTGCTGGCGGGGGTGGTGCCTCAACAATGCCCT |
| AJ302093m | 61  | TATAGCGAAATTGTTGGCAGTTACGATGTTGCTGGCGGGGGTGGTGCCTCAACAATGCCCT |
| Timopheev | 61  | TATAGCGAAATTGTTGGCAGTTACGATGTTGCTGGCGGGGGTGGTGCCTCAACAATGCCCT |
| DQ269826u | 61  | TATAGCGAAATTGTTGGCAGTTACGATGTTGCTGGCGGGGGTGGTGCCTCAACAATGCCCT |
| DQ269827u | 61  | TATAGCGAAATTGTTGGCAGTTACGATGTTGCTGGCGGGGGTGGTGCCTCAACAATGCCCT |
| DQ269828u | 61  | TATAGCGAAATTGTTGGCAGTTACGATGTTGCTGGCGGGGGTGGTGCCTCAACAATGCCCT |
| DQ269823m | 61  | TATAGCGAAATTGTTGGCAGTTACGATGTTGCTGGCGGGGGTGGTGCCTCAACAATGCCCT |
| DQ269822a | 61  | TATAGCGAAATTGTTGGCAGTTACGATGTTGCTGGCGGGGGTGGTGCCTCAACAATGCCCT |
| DQ269821a | 61  | TATAGCGAAATTGTTGGCAGTTACGATGTTGCTGGCGGGGGTGGTGCCTCAACAATGCCCT |
| DQ269820a | 61  | TATAGCGAAATTGTTGGCAGTTACGATGTTGCTGGCGGGGGTGGTGCCTCAACAATGCCCT |
| DQ269819a | 61  | TATAGCGAAATTGTTGGCAGTTACGATGTTGCTGGCGGGGGTGGTGCCTCAACAATGCCCT |
| AJ302092m | 61  | TATAGCGAAATTGTTGGCAGTTACGATGTTGCTGGCGGGGGTGGTGCCTCAACAATGCCCT |
|           |     |                                                               |
| PI355352  | 121 | CTAGAGACAAAGCTAAATTCATGCAGGAATTACCTGCTAGATCGATGCTCAACGATGAAG  |
| PI355353  | 121 | CTAGAGACAAAGCTAAATTCATGCAGGAATTACCTGCTAGATCGATGCTCAACGATGAAG  |
| TA2610    | 121 | CTAGAGACAAAGCTAAATTCATGCAGGAATTACCTGCTAGATCGATGCTCAACGATGAAG  |
| AJ249933m | 121 | CTAGAGACAAAGCTAAATTCATGCAGGAATTACCTGCTAGATCGATGCTCAACGATGAAG  |
| AJ242715m | 121 | CTAGAGACAAAGCTAAATTCATGCAGGAATTACCTGCTAGATCGATGCTCAACGATGAAG  |
| AJ302093m | 121 | CTAGAGACAAAGCTAAATTCATGCAGGAATTACCTGCTAGATCGATGCTCAACGATGAAG  |
| Timopheev | 121 | CTAGAGACAAAGCTAAATTCATGCAGGAATTACCTGCTAGATCGATGCTCAACGATGAAG  |
| DQ269826u | 121 | CTAGAGACAAAGCTAAATTCATGCAGGAATTACCTGCTAGATCGATGCTCAACGATGAAG  |
| DQ269827u | 121 | CTAGAGACAAAGCTAAATTCATGCAGGAATTACCTGCTAGATCGATGCTCAACGATGAAG  |
| DQ269828u | 121 | CTAGAGACAAAGCTAAATTCATGCAGGAATTACCTGCTAGATCGATGCTCAACGATGAAG  |
| DQ269823m | 121 | CTAGAGACAAAGCTAAATTCATGCAGGAATTACCTGCTAGATCGATGCTCAACGATGAAG  |
| DQ269822a | 121 | CTAGAGACAAAGCTAAATTCATGCAGGAATTACCTGCTAGATCGATGCTCAACGATGAAG  |
| DQ269821a | 121 | CTAGAGACAAAGCTAAATTCATGCAGGAATTACCTGCTAGATCGATGCTCAACGATGAAG  |
| DQ269820a | 121 | CTAGAGACAAAGCTAAATTCATGCAGGAATTACCTGCTAGATCGATGCTCAACGATGAAG  |
| DQ269819a | 121 | CTAGAGACAAAGCTAAATTCATGCAGGAATTACCTGCTAGATCGATGCTCAACGATGAAG  |
| AJ302092m | 121 | CTAGAGACAAAGCTAAATTCATGCAGGAATTACCTGCTAGATCGATGCTCAACGATGAAG  |



Li et al. *Ha* deletions during polyploid wheat speciation

|           |     |                                                              |
|-----------|-----|--------------------------------------------------------------|
| PI355352  | 181 | GATTTCCCGGTACCTGGCGTTGGTGGAAATGGTGAAGGGAGGTTGTCTAGAGCTCCTT   |
| PI355353  | 181 | GATTTCCCGGTACCTGGCGTTGGTGGAAATGGTGAAGGGAGGTTGTCTAGAGCTCCTT   |
| TA2610    | 181 | GATTTCCCGGTACCTGGCGTTGGTGGAAATGGTGAAGGGAGGTTGTCTAGAGCTCCTT   |
| AJ249933m | 181 | GATTTCCCGGTACCTGGCGTTGGTGGAAATGGTGAAGGGAGGTTGTCTAGAGCTCCTT   |
| AJ242715m | 181 | GATTTCCCGGTACCTGGCGTTGGTGGAAATGGTGAAGGGAGGTTGTCTAGAGCTCCTT   |
| AJ302093m | 181 | GATTTCCCGGTACCTGGCGTTGGTGGAAATGGTGAAGGGAGGTTGTCTAGAGCTCCTT   |
| Timopheev | 181 | GATTTCCCGGTACCTGGCGTTGGTGGAAATGGTGAAGGGAGGTTGTCTAGAGCTCCTT   |
| DQ269826u | 181 | GATTTCCCGGTACCTGGCGTTGGTGGAAATGGTGAAGGGAGGTTGTCTAGAGCTCCTT   |
| DQ269827u | 181 | GATTTCCCGGTACCTGGCGTTGGTGGAAATGGTGAAGGGAGGTTGTCTAGAGCTCCTT   |
| DQ269828u | 181 | GATTTCCCGGTACCTGGCGTTGGTGGAAATGGTGAAGGGAGGTTGTCTAGAGCTCCTT   |
| DQ269823m | 181 | GATTTCCCGGTACCTGGCGTTGGTGGAAATGGTGAAGGGAGGTTGTCTAGAGCTCCTT   |
| DQ269822a | 181 | GATTTCCCGGTACCTGGCGTTGGTGGAAATGGTGAAGGGAGGTTGTCTAGAGCTCCTT   |
| DQ269821a | 181 | GATTTCCCGGTACCTGGCGTTGGTGGAAATGGTGAAGGGAGGTTGTCTAGAGCTCCTT   |
| DQ269820a | 181 | GATTTCCCGGTACCTGGCGTTGGTGGAAATGGTGAAGGGAGGTTGTCTAGAGCTCCTT   |
| DQ269819a | 181 | GATTTCCCGGTACCTGGCGTTGGTGGAAATGGTGAAGGGAGGTTGTCTAGAGCTCCTT   |
| AJ302092m | 181 | GATTTCCCGGTACCTGGCGTTGGTGGAAATGGTGAAGGGAGGTTGTCTAGAGCTCCTT   |
| PI355352  | 241 | GGGAGTGTTCAGTCAGCTCGGCCAAATGCCACCGCAATGCCGCTGCAACATCATCCAG   |
| PI355353  | 241 | GGGAGTGTTCAGTCAGCTCGGCCAAATGCCACCGCAATGCCGCTGCAACATCATCCAG   |
| TA2610    | 241 | GGGAGTGTTCAGTCAGCTCGGCCAAATGCCACCGCAATGCCGCTGCAACATCATCCAG   |
| AJ249933m | 241 | GGGAGTGTTCAGTCAGCTCGGCCAAATGCCACCGCAATGCCGCTGCAACATCATCCAG   |
| AJ242715m | 241 | GGGAGTGTTCAGTCAGCTCGGCCAAATGCCACCGCAATGCCGCTGCAACATCATCCAG   |
| AJ302093m | 241 | GGGAGTGTTCAGTCAGCTCGGCCAAATGCCACCGCAATGCCGCTGCAACATCATCCAG   |
| Timopheev | 241 | GGGAGTGTTCAGTCAGCTCGGCCAAATGCCACCGCAATGCCGCTGCAACATCATCCAG   |
| DQ269826u | 241 | GGGAGTGTTCAGTCAGCTCGGCCAAATGCCACCGCAATGCCGCTGCAACATCATCCAG   |
| DQ269827u | 241 | GGGAGTGTTCAGTCAGCTCGGCCAAATGCCACCGCAATGCCGCTGCAACATCATCCAG   |
| DQ269828u | 241 | GGGAGTGTTCAGTCAGCTCGGCCAAATGCCACCGCAATGCCGCTGCAACATCATCCAG   |
| DQ269823m | 241 | GGGAGTGTTCAGTCAGCTCGGCCAAATGCCACCGCAATGCCGCTGCAACATCATCCAG   |
| DQ269822a | 241 | GGGAGTGTTCAGTCAGCTCGGCCAAATGCCACCGCAATGCCGCTGCAACATCATCCAG   |
| DQ269821a | 241 | GGGAGTGTTCAGTCAGCTCGGCCAAATGCCACCGCAATGCCGCTGCAACATCATCCAG   |
| DQ269820a | 241 | GGGAGTGTTCAGTCAGCTCGGCCAAATGCCACCGCAATGCCGCTGCAACATCATCCAG   |
| DQ269819a | 241 | GGGAGTGTTCAGTCAGCTCGGCCAAATGCCACCGCAATGCCGCTGCAACATCATCCAG   |
| AJ302092m | 241 | GGGAGTGTTCAGTCAGCTCGGCCAAATGCCACCGCAATGCCGCTGCAACATCATCCAG   |
| PI355352  | 301 | GGGTCAATCCAAGGCGACTCAGTGGCATCTTCGGATTTTCAGCGTGATCGGGCAAGCAAA |
| PI355353  | 301 | GGGTCAATCCAAGGCGACTCAGTGGCATCTTCGGATTTTCAGCGTGATCGGGCAAGCAAA |
| TA2610    | 301 | GGGTCAATCCAAGGCGACTCAGTGGCATCTTCGGATTTTCAGCGTGATCGGGCAAGCAAA |
| AJ249933m | 301 | GGGTCAATCCAAGGCGACTCAGTGGCATCTTCGGATTTTCAGCGTGATCGGGCAAGCAAA |
| AJ242715m | 301 | GGGTCAATCCAAGGCGACTCAGTGGCATCTTCGGATTTTCAGCGTGATCGGGCAAGCAAA |
| AJ302093m | 301 | GGGTCAATCCAAGGCGACTCAGTGGCATCTTCGGATTTTCAGCGTGATCGGGCAAGCAAA |
| Timopheev | 301 | GGGTCAATCCAAGGCGACTCAGTGGCATCTTCGGATTTTCAGCGTGATCGGGCAAGCAAA |
| DQ269826u | 301 | GGGTCAATCCAAGGCGACTCAGTGGCATCTTCGGATTTTCAGCGTGATCGGGCAAGCAAA |
| DQ269827u | 301 | GGGTCAATCCAAGGCGACTCAGTGGCATCTTCGGATTTTCAGCGTGATCGGGCAAGCAAA |
| DQ269828u | 301 | GGGTCAATCCAAGGCGACTCAGTGGCATCTTCGGATTTTCAGCGTGATCGGGCAAGCAAA |
| DQ269823m | 301 | GGGTCAATCCAAGGCGACTCAGTGGCATCTTCGGATTTTCAGCGTGATCGGGCAAGCAAA |
| DQ269822a | 301 | GGGTCAATCCAAGGCGACTCAGTGGCATCTTCGGATTTTCAGCGTGATCGGGCAAGCAAA |
| DQ269821a | 301 | GGGTCAATCCAAGGCGACTCAGTGGCATCTTCGGATTTTCAGCGTGATCGGGCAAGCAAA |
| DQ269820a | 301 | GGGTCAATCCAAGGCGACTCAGTGGCATCTTCGGATTTTCAGCGTGATCGGGCAAGCAAA |
| DQ269819a | 301 | GGGTCAATCCAAGGCGACTCAGTGGCATCTTCGGATTTTCAGCGTGATCGGGCAAGCAAA |
| AJ302092m | 301 | GGGTCAATCCAAGGCGACTCAGTGGCATCTTCGGATTTTCAGCGTGATCGGGCAAGCAAA |

Li et al. *Ha* deletions during polyploid wheat speciation

\*

```

PI355352 361 GTGATACAAGAAGCCAAGAACCTACCGCCCAAGGTGCAACCAGGGCCCTCCCTGCAACATC
PI355353 361 GTGATACAAGAAGCCAAGAACCTACCGCCCAAGGTGCAACCAGGGCCCTCCCTGCAACATC
TA2610 361 GTGATACAAGAAGCCAAGAACCTACCGCCCAAGGTGCAACCAGGGCCCTCCCTGCAACATC
AJ249933m 361 GTGATACAAGAAGCCAAGAACCTACCGCCCAAGGTGCAACCAGGGCCCTCCCTGCAACATC
AJ242715m 361 GTGATACAAGAAGCCAAGAACCTACCGCCCAAGGTGCAACCAGGGCCCTCCCTGCAACATC
AJ302093m 361 GTGATACAAGAAGCCAAGAACCTACCGCCCAAGGTGCAACCAGGGCCCTCCCTGCAACATC
Timopheev 361 GTGATACAAGAAGCCAAGAACCTGCCGCCAGGTGCAACCAGGGCCCTCCCTGCAACATC
DQ269826u 361 GTGATACAAGAAGCCAAGAACCTGCCGCCAGGTGCAACCAGGGCCCTCCCTGCAACATC
DQ269827u 361 GTGATACAAGAAGCCAAGAACCTGCCGCCAGGTGCAACCAGGGCCCTCCCTGCAACATC
DQ269828u 361 GTGATACAAGAAGCCAAGAACCTGCCGCCAGGTGCAACCAGGGCCCTCCCTGCAACATC
DQ269823m 361 GTGATACAAGAAGCCAAGAACCTGCCGCCAGGTGCAACCAGGGCCCTCCCTGCAACATC
DQ269822a 361 GTGATACAAGAAGCCAAGAACCTGCCGCCAGGTGCAACCAGGGCCCTCCCTGCAACATC
DQ269821a 361 GTGATACAAGAAGCCAAGAACCTGCCGCCAGGTGCAACCAGGGCCCTCCCTGCAACATC
DQ269820a 361 GTGATACAAGAAGCCAAGAACCTGCCGCCAGGTGCAACCAGGGCCCTCCCTGCAACATC
DQ269819a 361 GTGATACAAGAAGCCAAGAACCTGCCGCCAGGTGCAACCAGGGCCCTCCCTGCAACATC
AJ302092m 361 GTGATACAAGAAGCCAAGAACCTGCCGCCAAGGTGCAACCAGGGCCCTCCCTGCAACATC

```

Supplementary Fig. 5s. Alignment of DNA sequences of *Pina*. PI355352, PI355353 and TA2610 are *T. zhukovskyi*. Letters affixed to the GenBank accessions are abbreviations for the species or subspecies, a for *T. monococcum* subsp. *agilopoides*, m for *T. monococcum* subsp. *monococcum* and u for *T. urartu*. Timopheev is the consensus sequence of *Pina*-A of *T. timopheevii*. \* indicates the single nucleotide polymorphism (SNP) at position 384 where A is present in *T. monococcum* but not in *T. urartu*.

Li et al. *Ha* deletions during polyploid wheat speciation

DQ269857m 1 ATGAAGACCTTATTCCTCCTAGCTCTCCTTGCTCTTGTAGCGAGCACACCTTCGCGCAA  
DQ269856m 1 ATGAAGACCTTATTCCTCCTAGCTCTCCTTGCTCTTGTAGCGAGCACACCTTCGCGCAA  
PI355352 1 ATGAAGACCTTATTCCTCCTAGCCCTCCTTGCTCTTGTAGCGAGCACACCTTCGCGCAA  
PI355353 1 ATGAAGACCTTATTCCTCCTAGCCCTCCTTGCTCTTGTAGCGAGCACACCTTCGCGCAA  
TA2610 1 ATGAAGACCTTATTCCTCCTAGCCCTCCTTGCTCTTGTAGCGAGCACACCTTCGCGCAA  
DV92BACm 1 ATGAAGACCTTATTCCTCCTAGCCCTCCTTGCTCTTGTAGCGAGCACACCTTCGCGCAA  
AJ302102m 1 ATGAAGACCTTATTCCTCCTAGCCCTCCTTGCTCTTGTAGCGAGCACACCTTCGCGCAA  
DQ269855a 1 ATGAAGACCTTATTCCTCCTAGCCCTCCTTGCTCTTGTAGCGAGCACACCTTCGCGCAA  
DQ269854a 1 ATGAAGACCTTATTCCTCCTAGCCCTCCTTGCTCTTGTAGCGAGCACACCTTCGCGCAA  
DQ269853a 1 ATGAAGACCTTATTCCTCCTAGCCCTCCTTGCTCTTGTAGCGAGCACACCTTCGCGCAA  
DQ269852a 1 ATGAAGACCTTATTCCTCCTAGCCCTCCTTGCTCTTGTAGCGAGCACACCTTCGCGCAA  
AJ302101m 1 ATGAAGACCTTATTCCTCCTAGCCCTCCTTGCTCTTGTAGCGAGCACACCTTCGCGCAA  
DQ269860u 1 ATGAAGACCTTATTCCTCCTAGCCCTCCTTGCTCTTGTAGCGAGCACACCTTCGCGCAA  
DQ269859u 1 ATGAAGACCTTATTCCTCCTAGCCCTCCTTGCTCTTGTAGCGAGCACACCTTCGCGCAA  
DQ269861u 1 ATGAAGACCTTATTCCTCCTAGCCCTCCTTGCTCTTGTAGCGAGCACACCTTCGCGCAA  
Timopheev 1 ATGAAGACCTTATTCCTCCTAGCCCTCCTTGCTCTTGTAGCGAGCACACCTTCGCGCAA  
DQ269858u 1 ATGAAGACCTTATTCCTCCTAGCCCTCCTTGCTCTTGTAGCGAGCACACCTTCGCGCAA  
AJ249934m 1 ATGAAGACCTTATTCCTCCTAGCTCTCCTTGCTCTTGTAGCGAGCACACCTTCGCGCAA

\*

DQ269857m 61 TACTCAGAAGTTGGCGGCTGGTACAATGAAGTTGGTGCAGGAGGTGGTTCTCAACAATGC  
DQ269856m 61 TACTCAGAAGTTGGCGGCTGGTACAATGAAGTTGGTGCAGGAGGTGGTTCTCAACAATGC  
PI355352 61 TACTCAGAAGTTGGCGGCTGGTACAATGAAGTTGGTGCAGGAGGTGGTTCTCAACAATGC  
PI355353 61 TACTCAGAAGTTGGCGGCTGGTACAATGAAGTTGGTGCAGGAGGTGGTTCTCAACAATGC  
TA2610 61 TACTCAGAAGTTGGCGGCTGGTACAATGAAGTTGGTGCAGGAGGTGGTTCTCAACAATGC  
DV92BACm 61 TACTCAGAAGTTGGCGGCTGGTACAATGAAGTTGGTGCAGGAGGTGGTTCTCAACAATGC  
AJ302102m 61 TACTCAGAAGTTGGCGGCTGGTACAATGAAGTTGGTGCAGGAGGTGGTTCTCAACAATGC  
DQ269855a 61 TACTCAGAAGTTGGCGGCTGGTACAATGAAGTTGGTGCAGGAGGTGGTTCTCAACAATGC  
DQ269854a 61 TACTCAGAAGTTGGCGGCTGGTACAATGAAGTTGGTGCAGGAGGTGGTTCTCAACAATGC  
DQ269853a 61 TACTCAGAAGTTGGCGGCTGGTACAATGAAGTTGGTGCAGGAGGTGGTTCTCAACAATGC  
DQ269852a 61 TACTCAGAAGTTGGCGGCTGGTACAATGAAGTTGGTGCAGGAGGTGGTTCTCAACAATGC  
AJ302101m 61 TACTCAGAAGTTGGCGGCTGGTACAATGAAGTTGGTGCAGGAGGTGGTTCTCAACAATGC  
DQ269860u 61 TACTCAGAAGTTGGTGGCTGGTACAATGAAGTTGGTGCAGGAGGTGGTTCTCAACAATGC  
DQ269859u 61 TACTCAGAAGTTGGTGGCTGGTACAATGAAGTTGGTGCAGGAGGTGGTTCTCAACAATGC  
DQ269861u 61 TACTCAGAAGTTGGTGGCTGGTACAATGAAGTTGGTGCAGGAGGTGGTTCTCAACAATGC  
Timopheev 61 TACTCAGAAGTTGGTGGCTGGTACAATGAAGTTGGTGCAGGAGGTGGTTCTCAACAATGC  
DQ269858u 61 TACTCAGAAGTTGGTGGCTGGTACAATGAAGTTGGTGCAGGAGGTGGTTCTCAACAATGC  
AJ249934m 61 TACTCAGAAGTTGGCGGCTGGTACAATGAAGTTGGTGCAGGAGGTAGTTCTCAACAATGC

DQ269857m 121 CCGCTGGAGCGGCCGAAGCTAAGCTCTTGCAAGGATTACGTGATGGAGCGGTGTTTCACA  
DQ269856m 121 CCGCTGGAGCGGCCGAAGCTAAGCTCTTGCAAGGATTACGTGATGGAGCGGTGTTTCACA  
PI355352 121 CCGCTGGAGCGGCCGAAGCTAAGCTCTTGCAAGGATTACGTGATGGAGCGGTGTTTCACA  
PI355353 121 CCGCTGGAGCGGCCGAAGCTAAGCTCTTGCAAGGATTACGTGATGGAGCGGTGTTTCACA  
TA2610 121 CCGCTGGAGCGGCCGAAGCTAAGCTCTTGCAAGGATTACGTGATGGAGCGGTGTTTCACA  
DV92BACm 121 CCGCTGGAGCGGCCGAAGCTAAGCTCTTGCAAGGATTACGTGATGGAGCGGTGTTTCACA  
AJ302102m 121 CCGCTGGAGCGGCCGAAGCTAAGCTCTTGCAAGGATTACGTGATGGAGCGGTGTTTCACA  
DQ269855a 121 CCGCTGGAGCGGCCGAAGCTAAGCTCTTGCAAGGATTACGTGATGGAGCGGTGTTTCACA  
DQ269854a 121 CCGCTGGAGCGGCCGAAGCTAAGCTCTTGCAAGGATTACGTGATGGAGCGGTGTTTCACA  
DQ269853a 121 CCGCTGGAGCGGCCGAAGCTAAGCTCTTGCAAGGATTACGTGATGGAGCGGTGTTTCACA  
DQ269852a 121 CCGCTGGAGCGGCCGAAGCTAAGCTCTTGCAAGGATTACGTGATGGAGCGGTGTTTCACA  
AJ302101m 121 CCGCTGGAGCGGCCGAAGCTAAGCTCTTGCAAGGATTACGTGATGGAGCGGTGTTTCACA  
DQ269860u 121 CCGCTGGAGCGGCCGAAGCTAAGCTCTTGCAAGGATTACGTGATGGAGCGGTGTTTCACA  
DQ269859u 121 CCGCTGGAGCGGCCGAAGCTAAGCTCTTGCAAGGATTACGTGATGGAGCGGTGTTTCACA  
DQ269861u 121 CCGCTGGAGCGGCCGAAGCTAAGCTCTTGCAAGGATTACGTGATGGAGCGGTGTTTCACA  
Timopheev 121 CCGCTGGAGCGGCCGAAGCTAAGCTCTTGCAAGGATTACGTGATGGAGCGGTGTTTCACA  
DQ269858u 121 CCGCTGGAGCGGCCGAAGCTAAGCTCTTGCAAGGATTACGTGATGGAGCGGTGTTTCACA  
AJ249934m 121 CCGCTGGAGCGGCCGAAGCTAAGCTCTTGCAAGGATTATGTGATGGGTGGTGTTCACA

DQ269857m 181 ATGAAGGATTTTCCAGTCACTTGGCCACGAAATGGTGGAAAGGGCGGTTGTGAGCACGAG  
DQ269856m 181 ATGAAGGATTTTCCAGTCACTTGGCCACGAAATGGTGGAAAGGGCGGTTGTGAGCACGAG  
PI355352 181 ATGAAGGATTTTCCAGTCACTTGGCCACGAAATGGTGGAAAGGGCGGTTGTGAGCACGAG  
PI355353 181 ATGAAGGATTTTCCAGTCACTTGGCCACGAAATGGTGGAAAGGGCGGTTGTGAGCACGAG  
TA2610 181 ATGAAGGATTTTCCAGTCACTTGGCCACGAAATGGTGGAAAGGGCGGTTGTGAGCACGAG

Li et al. *Ha* deletions during polyploid wheat speciation

DV92BACm 181 ATGAAGGATTTTCCAGTCACTTGGCCACGAAATGGTGGAAAGGGCGGTTGTGAGCACGAG  
 AJ302102m 181 ATGAAGGATTTTCCAGTCACTTGGCCACGAAATGGTGGAAAGGGCGGTTGTGAGCACGAG  
 DQ269855a 181 ATGAAGGATTTTCCAGTCACTTGGCCACGAAATGGTGGAAAGGGCGGTTGTGAGCACGAG  
 DQ269854a 181 ATGAAGGATTTTCCAGTCACTTGGCCACGAAATGGTGGAAAGGGCGGTTGTGAGCACGAG  
 DQ269853a 181 ATGAAGGATTTTCCAGTCACTTGGCCACGAAATGGTGGAAAGGGCGGTTGTGAGCACGAG  
 DQ269852a 181 ATGAAGGATTTTCCAGTCACTTGGCCACGAAATGGTGGAAAGGGCGGTTGTGAGCACGAG  
 AJ302101m 181 ATGAAGGATTTTCCAGTCACTTGGCCACGAAATGGTGGAAAGGGCGGTTGTGAGCACGAG  
 DQ269860u 181 ATGAAGGATTTTCCAGTCACTTGGCCACGAAATGGTGGAAAGGGCGGTTGTGAGCACGAG  
 DQ269859u 181 ATGAAGGATTTTCCAGTCACTTGGCCACGAAATGGTGGAAAGGGCGGTTGTGAGCACGAG  
 DQ269861u 181 ATGAAGGATTTTCCAGTCACTTGGCCACGAAATGGTGGAAAGGGCGGTTGTGAGCACGAG  
 Timopheev 181 ATGAAGGATTTTCCAGTCACTTGGCCACGAAATGGTGGAAAGGGAGGTTGTGAGCACGAG  
 DQ269858u 181 ATGAAGGATTTTCCAGTCACTTGGCCACGAAATGGTGGAAAGGGCGGTTGTGAGCACGAG  
 AJ249934m 181 ATGAAGGATTTTCCATTCACCTTGGCCACGAAATGGTGGAAAGGGCGGTTGTGAGCATGAG

DQ269857m 241 GTCCGGGAGAA GTGCTGCCAGCAGCTGAGCCAGATAGCACCACAGTGTCTGCTGCGATTCT  
 DQ269856m 241 GTCCGGGAGAA GTGCTGCCAGCAGCTGAGCCAGATAGCACCACAGTGTCTGCTGCGATTCT  
 PI355352 241 GTCCGGGAGAA GTGCTGCCAGCAGCTGAGCCAGATAGCACCACAGTGTCTGCTGCGATTCT  
 PI355353 241 GTCCGGGAGAA GTGCTGCCAGCAGCTGAGCCAGATAGCACCACAGTGTCTGCTGCGATTCT  
 TA2610 241 GTCCGGGAGAA GTGCTGCCAGCAGCTGAGCCAGATAGCACCACAGTGTCTGCTGCGATTCT  
 DV92BACm 241 GTCCGGGAGAA GTGCTGCCAGCAGCTGAGCCAGATAGCACCACAGTGTCTGCTGCGATTCT  
 AJ302102m 241 GTCCGGGAGAA GTGCTGCCAGCAGCTGAGCCAGATAGCACCACAGTGTCTGCTGCGATTCT  
 DQ269855a 241 GTCCGGGAGAA GTGCTGCCAGCAGCTGAGCCAGATAGCACCACAGTGTCTGCTGCGATTCT  
 DQ269854a 241 GTCCGGGAGAA GTGCTGCCAGCAGCTGAGCCAGATAGCACCACAGTGTCTGCTGCGATTCT  
 DQ269853a 241 GTCCGGGAGAA GTGCTGCCAGCAGCTGAGCCAGATAGCACCACAGTGTCTGCTGCGATTCT  
 DQ269852a 241 GTCCGGGAGAA GTGCTGCCAGCAGCTGAGCCAGATAGCACCACAGTGTCTGCTGCGATTCT  
 AJ302101m 241 GTCCGGGAGAA GTGCTGCCAGCAGCTGAGCCAGATAGCACCACAGTGTCTGCTGCGATTCT  
 DQ269860u 241 GTCCGGGAGAA GTGCTGCCAGCAGCTGAGCCAGATAGCACCACAGTGTCTGCTGCGATTCT  
 DQ269859u 241 GTCCGGGAGAA GTGCTGCCAGCAGCTGAGCCAGATAGCACCACAGTGTCTGCTGCGATTCT  
 DQ269861u 241 GTCCGGGAGAA GTGCTGCCAGCAGCTGAGCCAGATAGCACCACAGTGTCTGCTGCGATTCT  
 Timopheev 241 GTCCGGGAGAA GTGCTGCCAGCAGCTGAGCCAGATAGCACCACAGTGTCTGCTGCGATTCT  
 DQ269858u 241 GTCCGGGAGAA GTGCTGCCAGCAGCTGAGCCAGATAGCACCACAGTGTCTGCTGCGATTCT  
 AJ249934m 241 GTCCGGGAGAA CTGCTGCAAGCAGCTGAGCCAGATAGCACCACAGTGTCTGCTGCGATTCT

DQ269857m 301 ATCCGAGGAATGATCCAAGGCAAGCTCGGTGGCTTCTTCGGAATTTGGCGAGGTGATGTA  
 DQ269856m 301 ATCCGAGGAATGATCCAAGGCAAGCTCGGTGGCTTCTTCGGAATTTGGCGAGGTGATGTA  
 PI355352 301 ATCCGAGGAATGATCCAAGGCAAGCTCGGTGGCTTCTTCGGAATTTGGCGAGGTGATGTA  
 PI355353 301 ATCCGAGGAATGATCCAAGGCAAGCTCGGTGGCTTCTTCGGAATTTGGCGAGGTGATGTA  
 TA2610 301 ATCCGAGGAATGATCCAAGGCAAGCTCGGTGGCTTCTTCGGAATTTGGCGAGGTGATGTA  
 DV92BACm 301 ATCCGAGGAATGATCCAAGGCAAGCTCGGTGGCTTCTTCGGAATTTGGCGAGGTGATGTA  
 AJ302102m 301 ATCCGAGGAATGATCCAAGGCAAGCTCGGTGGCTTCTTCGGAATTTGGCGAGGTGATGTA  
 DQ269855a 301 ATCCGAGGAATGATCCAAGGCAAGCTCGGTGGCTTCTTCGGAATTTGGCGAGGTGATGTA  
 DQ269854a 301 ATCCGAGGAATGATCCAAGGCAAGCTCGGTGGCTTCTTCGGAATTTGGCGAGGTGATGTA  
 DQ269853a 301 ATCCGAGGAATGATCCAAGGCAAGCTCGGTGGCTTCTTCGGAATTTGGCGAGGTGATGTA  
 DQ269852a 301 ATCCGAGGAATGATCCAAGGCAAGCTCGGTGGCTTCTTCGGAATTTGGCGAGGTGATGTA  
 AJ302101m 301 ATCCGAGGAATGATCCAAGGCAAGCTCGGTGGCTTCTTCGGAATTTGGCGAGGTGATGTA  
 DQ269860u 301 ATCCGAGGAATGATCCAAGGCAAGCTCGGTGGCTTCTTCGGAATTTGGCGAGGTGATGTA  
 DQ269859u 301 ATCCGAGGAATGATCCAAGGCAAGCTCGGTGGCTTCTTCGGAATTTGGCGAGGTGATGTA  
 DQ269861u 301 ATCCGAGGAATGATCCAAGGCAAGCTCGGTGGCTTCTTCGGAATTTGGCGAGGTGATGTA  
 Timopheev 301 ATCCGAGGAATGATCCAAGGCAAGCTCGGTGGCTTCTTCGGAATTTGGCGAGGTGATGTA  
 DQ269858u 301 ATCCGAGGAATGATCCAAGGCAAGCTCGGTGGCTTCTTCGGAATTTGGCGAGGTGATGTA  
 AJ249934m 301 ATCCGAGGAATGATCCAAGGCAAGCTCGGTGGCTTCTTTGGAATTTGGCGAGGTGATGTA

Li et al. *Ha* deletions during polyploid wheat speciation

```

DQ269857m 361 TTCAAACAAATTCAGAGGGCCAGAGCCTCCCCTCAAAGTGCAACATGGGAGCCGACTGC
DQ269856m 361 TTCAAACAAATTCAGAGGGCCAGAGCCTCCCCTCAAAGTGCAACATGGGAGCCGACTGC
PI355352 361 TTCAAACAAATTCAGAGGGCCAGAGCCTCCCCTCAAAGTGCAACATGGGAGCCGACTGC
PI355353 361 TTCAAACAAATTCAGAGGGCCAGAGCCTCCCCTCAAAGTGCAACATGGGAGCCGACTGC
TA2610    361 TTCAAACAAATTCAGAGGGCCAGAGCCTCCCCTCAAAGTGCAACATGGGAGCCGACTGC
DV92BACm 361 TTCAAACAAATTCAGAGGGCCAGAGCCTCCCCTCAAAGTGCAACATGGGAGCCGACTGC
AJ302102m 361 TTCAAACAAATTCAGAGGGCCAGAGCCTCCCCTCAAAGTGCAACATGGGAGCCGACTGC
DQ269855a 361 TTCAAACAAATTCAGAGGGCCAGAGCCTCCCCTCAAAGTGCAACATGGGAGCCGACTGC
DQ269854a 361 TTCAAACAAATTCAGAGGGCCAGAGCCTCCCCTCAAAGTGCAACATGGGAGCCGACTGC
DQ269853a 361 TTCAAACAAATTCAGAGGGCCAGAGCCTCCCCTCAAAGTGCAACATGGGAGCCGACTGC
DQ269852a 361 TTCAAACAAATTCAGAGGGCCAGAGCCTCCCCTCAAAGTGCAACATGGGAGCCGACTGC
AJ302101m 361 TTCAAACAAATTCAGAGGGCCAGAGCCTCCCCTCAAAGTGCAACATGGGAGCCGACTGC
DQ269860u 361 TTCAAACAAATTCAGAGGGCCAGAGCCTCCCCTCAAAGTGCAACATGGGAGCCGACTGC
DQ269859u 361 TTCAAACAAATTCAGAGGGCCAGAGCCTCCCCTCAAAGTGCAACATGGGAGCCGACTGC
DQ269861u 361 TTCAAACAAATTCAGAGGGCCAGAGCCTCCCCTCAAAGTGCAACATGGGAGCCGACTGC
Timopheev 361 TTCAAACAAATTCAGAGGGCCAGAGCCTCCCCTCAAAGTGCAACATGGGAGCCGACTGC
DQ269858u 361 TTCAAACAAATTCAGAGGGCCAGAGCCTCCCCTCAAAGTGCAACATGGGAGCCGACTGC
AJ249934m 361 TTCAAACAAATTCAGAGGGCCAGAGCCTCCCCTCAAAGTGCAACATGGGAGCCGACTGC

```

Supplementary Fig. 6s. Alignment of DNA sequences of *Pinb*. PI355352, PI355353 and TA2610 are *T. zhukovskyi*. Letters affixed to the GenBank accessions are abbreviations for the species or subspecies, a for *T. monococcum* subsp. *agilopoides*, m for *T. monococcum* subsp. *monococcum* and u for *T. urartu*. Timopheev is the consensus sequence of *Pinb*-A of *T. timopheevii*. \* indicates the single nucleotide polymorphism (SNP) at position 75 which distinguishes *T. monococcum* and *T. urartu*.

Li et al. *Ha* deletions during polyploid wheat speciation

```

TMB02      1  AGGTCCGATTTCAGTACACGGAACATCGCATATCTCAACAACCTCCACCAGTTTGGTGTGC
TH02/TMB02 1  AGGTCCGATTTCAGTACACGGAACATCGCATATCTCAACAACCTCCACCAGTTTGGTGTGC

TMB02      61  TTCCAAAGTAACTTTGATTGGTATCCAATAATCTTTTAAGCATTAGCTGAAGCAACACA
TH02/TMB02 61  TTCCAAAGTAACTTTGATTGGTATCCAATAATCTTTTAAGCATTAGCTGAAGCAACACA

TMB02      121  CAACTGCACACAGAAATCGTGCCACCTCATTATAAATAAAGGTGTGGCCTCATCTCATC
TH02/TMB02 121  CAACTGCACACAGAAATCGTGCCACCTCATTATAAATAAAGGTGTGGCCTCATCTCATC

TMB02      181  TATTCATCTCCACCTGCACAAAACACACTGACAACATGAAGGCCCTCTTCCTCATAGGC
TH02/TMB02 181  TATTCATCTCCACCTGCACAAAACACACTGACAACATGAAGGCCCTCTTCCTCATAGGC

TMB02      241  CTGCTTGCTCTGGTAGCGAGCACC GCCTTTGCGCAATATAGCGAAATTGTTGGCAGCTAC
TH02/TMB02 241  CTGCTTGCTCTGGTAGCGAGCACC GCCTTTGCGCAATATAGCGAAATTGTTGGCAGCTAC

TMB02      301  GATGTTGCTGGCGGGGTGGTGTCTCAACAATGCCCTCTAGAGACAAAGCTAAATTCATGC
TH02/TMB02 301  GATGTTGCTGGCGGGGTGGTGTCTCAACAATGCCCTCTAGAGACAAAGCTAAATTCATGC

TMB02      361  AGGAATTACCTGCTAGATCGATGCTCAACGATGAAGGATTTCCCGGTCACCTGGCGTTGG
TH02/TMB02 361  AGGAATTACCTGCTAGATCGATGCTCAACGATGAAGGATTTCCCGGTCACCTGGCGTTGG

TMB02      421  TGGAAATGGTGAAGGGAGGTTGTCTAGAGCTCCTTGGGGAGTGCTGCAGTCAGCTCGGC
TH02/TMB02 421  TGGAAATGGTGAAGGGAGGTTGTCTAGAGCTCCTTGGGGAGTGCTGCAGTCAGCTCGGC

TMB02      481  CAAATGCCACCGCAATGCCGCTGCAACATCATCCAGGGGTCAATCCAAGGCGATCTCGGT
TH02/TMB02 481  CAAATGCCACCGCAATGCCGCTGCAACATCATCCAGGGGTCAATCCAAGGCGATCTCGGT

TMB02      541  GGCATCTTCGGATTTTCAGCGTGATCGGGCAAGCAAAGTGATACAAGAAGCCAAGAACCTG
TH02/TMB02 541  GGCATCTTCGGATTTTCAGCGTGATCGGGCAAGCAAAGTGATACAAGAAGCCAAGAACCTG

TMB02      601  CCGCCCAGGTGCAACCAGGGCCCTCCCTGCAACATCCCCGGCACTATTGGCTATTA
TH02/TMB02 601  CCGCCCAGGTGCAACCAGGGCCCTCCCTGCAACATCCCCGGCACTATTGGCTATTA

```

Supplementary Fig. 7s Alignment of *Pina-A<sup>m</sup>* between the amphiploid TH02/TMB02 ( $2n=4x=28$ ,  $A^m A^m S^{sh} S^{sh}$ ) and its parent TMB02 (*T. monococcum*,  $2n=2x=14$ ,  $A^m A^m$ ).

Li et al. *Ha* deletions during polyploid wheat speciation

|            |     |                                                              |
|------------|-----|--------------------------------------------------------------|
| TH02       | 1   | AGGTCGGATTTCAGTACACGGAACATCACATATCTCAACAACCTCCACCAGTTTGTGTGC |
| TH02/TMB02 | 1   | AGGTCGGATTTCAGTACACGGAACATCACATATCTCAACAACCTCCACCAGTTTGTGTGC |
| TH02       | 61  | TTTCAAAGTAACTTTGATTGGTATCCAGCTATACAACACACAACCGCACACAGAAATCGT |
| TH02/TMB02 | 61  | TTTCAAAGTAACTTTGATTGGTATCCAGCTATACAACACACAACCGCACACAGAAATCGT |
| TH02       | 121 | GCCACCTCATTATAAATAAAGGTGTGGCCTCATCTCATCTACTCATCTCCACCTGCACC  |
| TH02/TMB02 | 121 | GCCACCTCATTATAAATAAAGGTGTGGCCTCATCTCATCTATTTCATCTCCACCTGCACC |
| TH02       | 181 | AAAACACACTGACAACATGAAGGCCCTCTTCCTCATAGGCCTGCTTGCTCTGGTAGCGAG |
| TH02/TMB02 | 181 | AAAACACACTGACAACATGAAGGCCCTCTTCCTCATAGGCCTGCTTGCTCTGGTAGCGAG |
| TH02       | 241 | CACCGCCTTTGCGCAATATAGCGAAGTTGTTGGCAGTTACGATGCTGCTGGCGGGGGTGG |
| TH02/TMB02 | 241 | CACCGCCTTTGCGCAATATAGCGAAGTTGTTGGCAGTTACGATGCTGCTGGCGGGGGTGG |
| TH02       | 301 | TGCTCAACAATGCCCTCTAGAGACAAAGCTAAATGCATGCAGGAATTACTTGCTAGATCG |
| TH02/TMB02 | 301 | TGCTCAACAATGCCCTCTAGAGACAAAGCTAAATGCATGCAGGAATTACTTGCTAGATCG |
| TH02       | 361 | ATGCTCAACGATGAAGGATTTCCCAGTCACCTGGCGTTGGTGGAGATGGTGAAGGGAGG  |
| TH02/TMB02 | 361 | ATGCTCAACGATGAAGGATTTCCCAGTCACCTGGCGTTGGTGGAGATGGTGAAGGGAGG  |
| TH02       | 421 | TTGTCAAGAGCTCCTTGGGGAGTGTTCAGTCGGCTCGGCCAACTGCCACCGCAATGCCG  |
| TH02/TMB02 | 421 | TTGTCAAGAGCTCCTTGGGGAGTGTTCAGTCGGCTCGGCCAACTGCCACCGCAATGCCG  |
| TH02       | 481 | CTGCAACATCATCCAGGGTCAATCCAAGGCAATCTCGGTGGCATCTTCGGATTTACAGCG |
| TH02/TMB02 | 481 | CTGCAACATCATCCAGGGTCAATCCAAGGCAATCTCGGTGGCATCTTCGGATTTACAGCG |
| TH02       | 541 | TGATCGGGCAAGCAAAGTGATACAAGAAGCCAAGAACCTGCCGCCAGGTGCAACCAGGG  |
| TH02/TMB02 | 541 | TGATCGGGCAAGCAAAGTGATACAAGAAGCCAAGAACCTGCCGCCAGGTGCAACCAGGG  |
| TH02       | 601 | CCCTCCCTGCGACATCCGCAGCACCAGTGGCTATTACT                       |
| TH02/TMB02 | 601 | CCCTCCCTGCGACATCCGCAGCACCAGTGGCTATTACT                       |

Supplementary Fig. 8s. Alignment of *Pina-S<sup>sh</sup>* between the amphiploid TH02/TMB02 ( $2n=4x=28$ ,  $A^mS^{sh}S^{sh}$ ) and its parent TH02 (*Ae. sharonensis*,  $2n=2x=14$ ,  $S^{sh}S^{sh}$ ).

Li et al. *Ha* deletions during polyploid wheat speciation

```

TMB02      1  AGGTAATTTGCAGTCGGCTCCCATGTTGCACCTTTGAGGGGAGGCTCTGGGCCCTCTGAAT
TH02/TMB02 1  AGGTAATTTGCAGTCGGCTCCCATGTTGCACCTTTGAGGGGAGGCTCTGGGCCCTCTGAAT

TMB02      61  TTGTTTGAATGCATCACCTCGCCAAATTCGAAGAAGCCACCGAGCTTGCCTTGGATCAT
TH02/TMB02 61  TTGTTTGAATGCATCACCTCGCCAAATTCGAAGAAGCCACCGAGCTTGCCTTGGATCAT

TMB02      121  TCCTCGGATAGAATCGCAGCGACACTGTGGTGTATCTGGCTCAGCTGCTGGCAGCACTT
TH02/TMB02 121  TCCTCGGATAGAATCGCAGCGACACTGTGGTGTATCTGGCTCAGCTGCTGGCAGCACTT

TMB02      181  CTCCCGGACCTCGTGCTCACAACCGCCCTTCCACCATTTCTGTTGGGCAAGTACTGGAAA
TH02/TMB02 181  CTCCCGGACCTCGTGCTCACAACCGCCCTTCCACCATTTCTGTTGGGCAAGTACTGGAAA

TMB02      241  ATCCTTCATTGTGAAACACCGCTCCATCACGTAATCCTTGCAAGAGCTTAGCTTCGGCCG
TH02/TMB02 241  ATCCTTCATTGTGAAACACCGCTCCATCACGTAATCCTTGCAAGAGCTTAGCTTCGGCCG

TMB02      301  CTCCAGCGGGCATTGTTGAGAACCACCTCCTGCACCAACTTCATTGTACCAGCCGCCAAC
TH02/TMB02 301  CTCCAGCGGGCATTGTTGAGAACCACCTCCTGCACCAACTTCATTGTACCAGCCGCCAAC

TMB02      361  TTCTGAGTATTGCGCGAAGGTTGTGCTCGCTACAAGAGCAAGGAGAGCTAGGAGGAATAA
TH02/TMB02 361  TTCTGAGTATTGCGCGAAGGTTGTGCTCGCTACAAGAGCAAGGAGAGCTAGGAGGAATAA

TMB02      421  GGTCTTCATGTTTTCAATGTTGTTTTGGTGGTGGTGGTGGAGATGAATAGATGGGTTGAG
TH02/TMB02 421  GGTCTTCATGTTTTCAATGTTGTTTTGGTGGTGGTGGTGGAGATGAATAGATGGGTTGAG

TMB02      481  ACTCCCCTTTATTTATTGCTTAGTGACATGGTTTTTGCCTACCATTGTGTGTTGCTTTGG
TH02/TMB02 481  ACTCCCCTTTATTTATTGCTTAGTGACATGGTTTTTGCCTACCATTGTGTGTTGCTTTGG

TMB02      541  CTAATGCTCACGAATTAAGTTACTTTGCGAGCCAACAGAAATGGTGCCTTGTGAGACA
TH02/TMB02 541  CTAATGCTCACGAATTAAGTTACTTTGCGAGCCAACAGAAATGGTGCCTTGTGAGACA

TMB02      601  GGTGACG
TH02/TMB02 601  GGTGACG

```

Supplementary Fig. 9s. Alignment of *Pinb-A<sup>m</sup>* between the amphiploid TH02/TMB02 ( $2n=4x=28$ ,  $A^m A^m S^{sh} S^{sh}$ ) and its parent TMB02 (*T. monococcum*,  $2n=2x=14$ ,  $A^m A^m$ ).



Li et al. *Ha* deletions during polyploid wheat speciation

|            |     |                                                               |
|------------|-----|---------------------------------------------------------------|
| TH02       | 1   | TTTCTCAACAACCTTGCACCGTTTCTGTTTGCTCGCAAAGTAACTTTAATTAGTACCAACT |
| TH02/TMB02 | 1   | TTTCTCAACAACCTTGCACCGTTTCTGTTTGCTCGCAAAGTAACTTTAATTAGTACCAACT |
| TH02       | 61  | AAATTTGTAAGCATTAGCCAAAGCGACACACAATGGTAGGCAAAAACCATGTCCCGTAGC  |
| TH02/TMB02 | 61  | AAATTTGTAAGCATTAGCCAAAGCGACACACAATGGTAGGCAAAAACCATGTCTCGTAGC  |
| TH02       | 121 | AATAAATAAAGGGGAGCCTCAACCCATCTATTCATCTCCAACACCACCAAAACAACATTG  |
| TH02/TMB02 | 121 | AATAAATAAAGGGGAGCCTCAACCCATCTATTCATCTCCAACACCACCAAAACAACATTG  |
|            |     | *                                                             |
| TH02       | 181 | AAAGCATGAAGTCCTTATTCCTCCTAGGTCTCCTTGCTCTTGTAGCGAGCACAACCTTCG  |
| TH02/TMB02 | 181 | AAAGCATGAAGTCCTTATTCCTCCTAGGTCTCCTTGCTCTTGTAGCGAGCACAACCTTCG  |
| TH02       | 241 | CGCAATACTCAGAAGTTGGCGGCTGGTACAATGAAGTTGGCGGAGGAGGTGGTTCCTCAAC |
| TH02/TMB02 | 241 | CGCAATACTCA----- <u>GAAGTTGGCGGAGGAGGTGGTTCCTCAAC</u>         |
| TH02       | 301 | AATGCCACAGGAGCGACCGAAGCTAGGCTCTTGCAAGGATTACGCCTGGAGCGGTGCT    |
| TH02/TMB02 | 280 | AATGCCACAGGAGCGACCGAAGCTAGGCTCTTGCAAGGATTACGCCTGGAGCGGTGCT    |
| TH02       | 361 | TCACAATGAAGGATTTTCCAGTCACCTGGCCACAAAATGGTGAAGGGTGGATGTGAGC    |
| TH02/TMB02 | 340 | TCACAATGAAGGATTTTCCAGTCACCTGGCCACAAAATGGTGAAGGGTGGATGTGAGC    |
| TH02       | 421 | ATGAGGTTCTGGGAGAAGTGCTGCAAGCAACTGAGCGAGATAGCACACAGTGTCTGATGCG |
| TH02/TMB02 | 400 | ATGAGGTTCTGGGAGAAGTGCTGCAAGCAGCTGAGCGAGATAGCACACAGTGTCTGATGCG |
| TH02       | 481 | ATTCTCTCCATAGAGTGATCCAAGGCAAGCTCGGTGGTTTCTTTGGCATTGGCGAGGTG   |
| TH02/TMB02 | 460 | ATTCTCTCCATAGAGTGATCCAAGGCAAGCTCGGTGGTTTCTTTGGCATTGGCGAGGTG   |
| TH02       | 541 | AGGTATTCAAACAAATTCAGAGGGCCAGAGCCTCCCCTCAAAGTGCAACATGGGCGCTG   |
| TH02/TMB02 | 520 | AGGTATTCAAACAAATTCAGAGGGCCAGAGCCTCCCCTCAAAGTGCAACATGGGCGCTG   |
| TH02       | 601 | ACTGCAAGTTTCCTA                                               |
| TH02/TMB02 | 580 | ACTGCAAGTTTCCTA                                               |

Supplementary Fig. 10s. Alignment of *Pinb-S<sup>sh</sup>* between the amphiploid TH02/TMB02 ( $2n=4x=28$ ,  $A^m A^m S^{sh} S^{sh}$ ) and its parent TH02 (*Ae. sharonensis*,  $2n=2x=14$ ,  $S^{sh} S^{sh}$ ). The 11-mer direct repeat (GAAGTTGGCGG) is underlined. \* indicates the start codon.

Li et al. *Ha* deletions during polyploid wheat speciation

```

TA831      1  AGGTCGGATT CAGTACACGGAACATCACATATCTCAACAACCTCCACCAGTTTTGTGTGC
TA3438     1  AGGTCGGATT CAGTACACGGAACATCACATATCTCAACAACCTCCACCAGTTTTGTGTGC

TA831     61  TTCCAAAGTAACTTTGATTGGTATCCAAC TAATCTTTTAAGCATTAGCTGAAGCAACACA
TA3438     61  TTCCAAAGTAACTTTGATTGGTATCCAAC TAATCTTTTAAGCATTAGCTGAAGCAACACA

TA831    121  CAACTGCACACAGAAATCGTGCCACCTCATTTATAAATAAAGGTGTGGCCTCATCTCATC
TA3438    121  CAACTGCACACAGAAATCGTGCCACCTCATTTATAAATAAAGGTGTGGCCTCATCTCATC

TA831    181  TATTCATCTCCACCTGCACGAAAACACACTGACAACATGAAGGCCCTCTTCCTCATAGGC
TA3438    181  TATTCATCTCCACCTGCACGAAAACACACTGACAACATGAAGGCCCTCTTCCTCATAGGC

TA831    241  CTGCTTGCTCTGGTAGCGAGCACCGCCTTTGCGCAATATAGCGAAATTGTTGGCAGTTAC
TA3438    241  CTGCTTGCTCTGGTAGCGAGCACCGCCTTTGCGCAATATAGCGAAATTGTTGGCAGTTAC

TA831    301  GATGTTGCTGGCGGGGTGGTGCTCAACAATGCCCTCTAGAGACAAAGCTAAATTCATGC
TA3438    301  GATGTTGCTGGCGGGGTGGTGCTCAACAATGCCCTCTAGAGACAAAGCTAAATTCATGC

TA831    361  AGGAATTACCTGCTAGATCGATGCTCAACGATGAAGGATTTCCCGGTCACCTGGCGTTGG
TA3438    361  AGGAATTACCTGCTAGATCGATGCTCAACGATGAAGGATTTCCCGGTCACCTGGCGTTGG

TA831    421  TGGAAATGGTGAAGGGAGGTTGTCTAGAGCTCCTTGGGGAGTGTTCAGTCAGCTCGGC
TA3438    421  TGGAAATGGTGAAGGGAGGTTGTCTAGAGCTCCTTGGGGAGTGTTCAGTCAGCTCGGC

TA831    481  CAAATGCCACCGCAATGCCGCTGCAACATCATCCAGGGTCAATCCAAGGCGACCTCAGT
TA3438    481  CAAATGCCACCGCAATGCCGCTGCAACATCATCCAGGGTCAATCCAAGGCGACCTCAGT

TA831    541  GGCATCTTCGGATTT CAGCGTGATCGGGCAAGCAAAGTGATACAAGAAGCCAAGAACCTG
TA3438    541  GGCATCTTCGGATTT CAGCGTGATCGGGCAAGCAAAGTGATACAAGAAGCCAAGAACCTG

TA831    601  CCGCCCAGGTGCAACCAGGGCCCTCCCTGCAACATCCCCGGCACTATTGGCTATT
TA3438    601  CCGCCCAGGTGCAACCAGGGCCCTCCCTGCAACATCCCCGGCACTATTGGCTATT

```

Supplementary Fig. 11s. Alignment of *Pina-A* between the amphiploid TA3438 ( $2n=4x=28$ , AASS) and its parent TA831 (*T. urartu*,  $2n=2x=14$ , AA).

Li et al. *Ha* deletions during polyploid wheat speciation

```

TA1785 1 AGGTCGGATT CAGTACACGGAACATCACATATCTCAACAACCTCCACCAGTTTCGTGTGC
TA3438 1 AGGTCGGATT CAGTACACGGAACATCACATATCTCAACAACCTCCACCAGTTTGTGTGC

TA1785 61 TTTCAAAGTAACTTTGATTGGTATCCAGCTATACAACACA CAACCGCACACAGAAATCGT
TA3438 61 TTTCAAAGTAACTTTGATTGGTATCCAGCTATACAACACA TAACCGCACACAGAAATCGT

TA1785 121 GCCACCTCATT TATAAATAAAGGTGTGGCCTCATCTCATCTATTTCATCTCCACCTGTACC
TA3438 121 GCCACCTCATT TATAAATAAAGGTGTGGCCTCATCTCATCTATTTCATCTCCACCTGCACC

TA1785 181 AAAACACACTGACAACATGAAGGCCCTCTTCCTCATAGGCCTGCTTGCTCTGGTAGCGAG
TA3438 181 AAAACACACTGACAACATGAAGGCCCTCTTCCTCATAGGCCTGCTTGCTCTGGTAGCGAG

TA1785 241 CACCGCCTTTGCGCAATATAGCGAAGTTGTTGGCAGTTACGATGTTGCTGGCGGGGGTGG
TA3438 241 CACCGCCTTTGCGCAATATAGCGAAGTTGTTGGCAGTTACGATGTTGCTGGCGGGGGTGG

TA1785 301 TGCTCAACAATGCCCTCTAGAGACAAAGCTAAATTCATGCAGGAATTACTTGCTAGATCG
TA3438 301 TGCTCAACAATGCCCTCTAGAGACAAAGCTAAATTCATGCAGGAATTACTTGCTAGATCG

TA1785 361 ATGCTCAACGATGAAGGATTTCCCGGTCACCTGGCGTTGGTGGAGATGGTGAAGGGAGG
TA3438 361 ATGCTCAACGATGAAGGATTTCCCGGTCACCTGGCGTTGGTGGAGATGGTGAAGGGAGG

TA1785 421 TTGTCTAGAGTCCTTGGGGAGTGTTCAGTCGGCTCGGCCAACTACCACCGCAATGCCG
TA3438 421 TTGTCTAGAGTCCTTGGGGAGTGTTCAGTCGGCTCGGCCAACTACCACCGCAATGCCG

TA1785 481 CTGCAACATCATCCAGGGTCAATCCAAGGCGATCTCGGTGGCATCTTCGGATTT CAGCG
TA3438 481 CTGCAACATCATCCAGGGTCAATCCAAGGCGATCTCGGTGGCATCTTCGGATTT CAGCG

TA1785 541 TGATCGGGCAAGCAAAGTGATACAAGAAGCCAAGAACCTGCCGCCAGGTGCAACCAGGG
TA3438 541 TGATCGGGCAAGCAAAGTGATACAAGAAGCCAAGAACCTGCCGCCAGGTGCAACCAGGG

TA1785 601 CCCTCCCTGCGACATCCGCAGCACCAGTGGCTATTACT
TA3438 601 CCCTCCCTGCGACATCCGCAGCACCAGTGGCTATTACT

```

Supplementary Fig. 12s. Alignment of *Pina-S* between the amphiploid TA3438 ( $2n=4x=28$ , AASS) and its parent TA1785 (*Ae. speltoides*,  $2n=2x=14$ , SS).

Li et al. *Ha* deletions during polyploid wheat speciation

```

TA831      1  AGGTAATTTGCAGTCGGCTCCCATGTTGCACTTTGAGGGGAGGCTCTGGGCCCTCTGAAT
TA3438     1  AGGTAATTTGCAGTCGGCTCCCATGTTGCACTTTGAGGGGAGGCTCTGGGCCCTCTGAAT

TA831     61  TTGTTTGAATACATCACCTCGCAAATTCGAAGAAGCCACCGAGCTTGCCTTGGATCAT
TA3438     61  TTGTTTGAATACATCACCTCGCAAATTCGAAGAAGCCACCGAGCTTGCCTTGGATCAT

TA831    121  TCCTCGGATAGAATCGCAGCGACACTGTGGTGCTATCTGGCTCAGCTGCTGGCAGCACTT
TA3438    121  TCCTCGGATAGAATCGCAGCGACACTGTGGTGCTATCTGGCTCAGCTGCTGGCAGCACTT

TA831    181  CTCCCGAACCTCGTGCTCACAACCGCCCTTCCACCATTTTGTGGGCCAAGTGACTGGAAA
TA3438    181  CTCCCGAACCTCGTGCTCACAACCGCCCTTCCACCATTTTGTGGGCCAAGTGACTGGAAA

TA831    241  ATCCTTCATTGTGAAACACCGCTCCATCACGTAATCCTTGCAAGAGCTTAGCTTCGGCCG
TA3438    241  ATCCTTCATTGTGAAACACCGCTCCATCACGTAATCCTTGCAAGAGCTTAGCTTCGGCCG

TA831    301  CTCCAGCGGGCATTGTTGAGAACCACCTCCTGCACCAACTTCATTGTACCAGCCACCAAC
TA3438    301  CTCCAGCGGGCATTGTTGAGAACCACCTCCTGCACCAACTTCATTGTACCAGCCACCAAC

TA831    361  TTCTGAGTATTGCGCGAAGGTTGTGCTCGCTACAAGAGCAAGGAGGGCTAGGAGGAATAA
TA3438    361  TTCTGAGTATTGCGCGAAGGTTGTGCTCGCTACAAGAGCAAGGAGGGCTAGGAGGAATAA

TA831    421  GGTCTTCATGTTTTCAATGTTGTTTTGGTGGTGGTGGTGGAGATGAATAGATGGGTTGAG
TA3438    421  GGTCTTCATGTTTTCAATGTTGTTTTGGTGGTGGTGGTGGAGATGAATAGATGGGTTGAG

TA831    481  GCTCCCCTTTATTTATTGCTTAGTGACATGGTTTTTGCCTACCATTGTGTGTTGCTTTGG
TA3438    481  GCTCCCCTTTATTTATTGCTTAGTGACATGGTTTTTGCCTACCATTGTGTGTTGCTTTGG

TA831    541  CTAATGCTCACAAATTAAAGTTACTTTGCGAGCCAACAGAAATGGTGCCTGTTGAGACA
TA3438    541  CTAATGCTCACAAATTAAAGTTACTTTGCGAGCCAACAGAAATGGTGCCTGTTGAGACA

TA831    601  GGTGACG
TA3438    601  GGTGACG

```

Supplementary Fig. 13s. Alignment of *Pinb-A* between the amphiploid TA3438 ( $2n=4x=28$ , AASS) and its parent TA831 (*T. urartu*,  $2n=2x=14$ , AA).

Li et al. *Ha* deletions during polyploid wheat speciation

TA1785 1 TTTCTCAACAACCTTGCACCGTTTCTGTTTGCTCGCAAAGTAACTTTAATTAGTACCAACT  
TA3438 1 TTTCTCAACAACCTTGCACCGTTTCTGTTTGCTCGCAAAGTAACTTTAATTAGTACCAACT

TA1785 61 AGATTTGTAAGCATTAGCCAAAGCGACACACTATGGTAGGCAAAAACCATGTCTCGTAGC  
TA3438 61 AGATTTGTAAGCATTAGCCAAAGCGACACACTATGGTAGGCAAAAACCATGTCTCGTAGC

TA1785 121 AATAAATAAAGGGGAGCCTCAACCCATCTATTTCATCTCCAACACCACAAAACAACATTG  
TA3438 121 AATAAATAAAGGGGAGCCTCAACCCATCTATTTCATCTCCAACACCACAAAACAACATTG

TA1785 181 AAAACATGAAGTCCTTATTCTCTCCTAGGTCTCCTTGCTCTTGTAGCGAGCACAACCTTCG  
TA3438 181 AAAACATGAAGTCCTTATTCTCTCCTAGGTCTCCTTGCTCTTGTAGCGAGCACAACCTTCG

TA1785 241 CGCAATACTCAGAAGTTGGCGGCTGGTACAATGAAGTTGGCGGAGGAAGTGGTTCTCAAC  
TA3438 241 CGCAATACTCAGAAGTTGGCGGCTGGTACAATGAAGTTGGCGGAGGAAGTGGTTCTCAAC

TA1785 301 AATGCCACAGGAGCGACCGAAGCTAGGCTCTTGCAAGGATTACGTGTTGGAGCGGTGCT  
TA3438 301 AATGCCACAGGAGCGACCGAAGCTAGGCTCTTGCAAGGATTACGTGTTGGAGCGGTGCT

TA1785 361 TCACAATGAAGGATTTTCCAGTCACCTGGCCCACAAAATGGTGGAAGGGTGGATGTGAGC  
TA3438 361 TCACAATGAAGGATTTTCCAGTCACCTGGCCCACAAAATGGTGGAAGGGTGGATGTGAGC

TA1785 421 ATGAGGTTCCGGGAGAAGTGCTGCAAGCAGCTGAGCCAGATAGCACACAGTGTGCTGCG  
TA3438 421 ATGAGGTTCCGGGAGAAGTGCTGCAAGCAGCTGAGCCAGATAGCACACAGTGTGCTGCG

TA1785 481 ATTCTCTCCATAGAGTGATCCAAGGCAAGCTCGGCGGTTTCTTTGGCATTGGCGAGGTG  
TA3438 481 ATTCTCTCCATAGAGTGATCCAAGGCAAGCTCGGCGGTTTCTTTGGCATTGGCGAGGTG

TA1785 541 AGGTATTCAACAATAATTCAAGGGCCAGAGCCTCCCCTCAAAGTGCAACATGGGCGCTG  
TA3438 541 AGGTATTCAACAATAATTCAAGGGCCAGAGCCTCCCCTCAAAGTGCAACATGGGCGCTG

TA1785 601 ACTGCAAGTTTCCTA  
TA3438 601 ACTGCAAGTTTCCTA

Supplementary Fig. 14s. Alignment of *Pina-S* between the amphiploid TA3438 ( $2n=4x=28$ , AASS) and its parent TA1785 (*Ae. speltoides*,  $2n=2x=14$ , SS).
